# Supplementary material for: Unravelling the effect of paramagnetic Ni2+on the13C NMR shift tensor for carbonate in Mg2−xNixAl layered double hydroxides by quantum-chemical computations
Source: Royal Society of Chemistry journal article supplement (doi:10.1039/d3cp03053a), 2023-01-01
Supplement: d3cp03053a1.pdf [file d3cp03053a1.pdf]

**Supporting Information for:**

**Unravelling the effect of paramagnetic Ni<sup>2+</sup> on the <sup>13</sup>C NMR shift tensor for carbonate in  
Mg<sub>2-x</sub>Ni<sub>x</sub>Al layered double hydroxides by quantum-chemical computations**

Megha Mohan,<sup>a</sup> Anders B. A. Andersen,<sup>bc</sup> Jiri Mareš,<sup>a</sup> Nicholai Daugaard Jensen,<sup>b</sup>

Ulla Gro Nielsen<sup>b\*</sup> and Juha Vaara<sup>a\*</sup>

<sup>a</sup>NMR Research Unit, P.O. Box 3000, FI-90014 University of Oulu, Finland

<sup>b</sup>Department of Physics, Chemistry and Pharmacy, University of Southern Denmark,

Campusvej 55, DK-5230 Odense, Denmark

<sup>c</sup>Present address: Department for Nuclear Medicine, Herlev Hospital, Borgmester Ib Juuls Vej 71,

DK-2730 Herlev, Denmark

\*Corresponding authors: [juha.vaara@oulu.fi](mailto:juha.vaara@oulu.fi), [ugn@sdu.dk](mailto:ugn@sdu.dk)

## Contents

|                                                                                                                                                                              |        |
|------------------------------------------------------------------------------------------------------------------------------------------------------------------------------|--------|
| <b>Figure S1.</b> PXRD of the $Mg_{2-x}Ni_xAl$ -LDH samples.                                                                                                                 | ESI-3  |
| <b>Table S1.</b> Optimised unit cell of the 1M structure.                                                                                                                    | ESI-4  |
| <b>Table S2.</b> Optimised unit cell of the 2T structure.                                                                                                                    | ESI-6  |
| <b>Construction and optimisation of the finite cluster models for <math>Ni^{2+}</math> susceptibility.</b>                                                                   | ESI-8  |
| <b>Figure S2.</b> Atomic structure of the cluster models of the paramagnetic Ni site.                                                                                        | ESI-9  |
| <b>Table S3.</b> Numbers of different centres in the cluster models of the paramagnetic Ni site.                                                                             | ESI-9  |
| <b>Table S4.</b> Atomic coordinates of the small cluster model of the paramagnetic Ni site.                                                                                  | ESI-10 |
| <b>Table S5.</b> Atomic coordinates of the medium cluster model of the paramagnetic Ni site.                                                                                 | ESI-12 |
| <b>Table S6.</b> Atomic coordinates of the large cluster model of the paramagnetic Ni site.                                                                                  | ESI-15 |
| <b>Figure S3.</b> The calculated electronic spin densities for the cluster models of the paramagnetic Ni site                                                                | ESI-19 |
| <b>Table S7.</b> Atomic positions (Å) of the cluster model used for the calculation of the local hyperfine contributions, $\sigma_{con}$ , to the $^{13}C$ shielding tensor. | ESI-20 |
| <b>Figure S4.</b> Experimental and simulated $^{13}C$ MAS NMR spectra of the $Mg_{2-x}Ni_xAl$ -LDH samples.                                                                  | ESI-23 |
| <b>Table S8.</b> $^{13}C$ MAS NMR parameters reported in the Haerberlen convention.                                                                                          | ESI-24 |
| <b>Table S9.</b> Calculated orbital shielding tensors.                                                                                                                       | ESI-25 |
| <b>Table S10.</b> Calculated local hyperfine contributions to the $^{13}C$ NMR shielding tensor.                                                                             | ESI-26 |
| <b>Anisotropic shift results from individual carbon sites (method 2).</b>                                                                                                    | ESI-27 |
| <b>Figure S5.</b> $^{13}C$ chemical shift tensor eigenvalues following method 2.                                                                                             | ESI-28 |
| <b>Table S11.</b> $^{13}C$ chemical shift eigenvalue data using method 2.                                                                                                    | ESI-29 |
| <b>Anisotropic shift results from diagonalised average tensors (method 3).</b>                                                                                               | ESI-30 |
| <b>Figure S6.</b> $^{13}C$ chemical shift tensor eigenvalues following method 3.                                                                                             | ESI-31 |
| <b>Table S12.</b> $^{13}C$ chemical shift eigenvalue data using method 3.                                                                                                    | ESI-32 |
| <b>References</b>                                                                                                                                                            | ESI-33 |

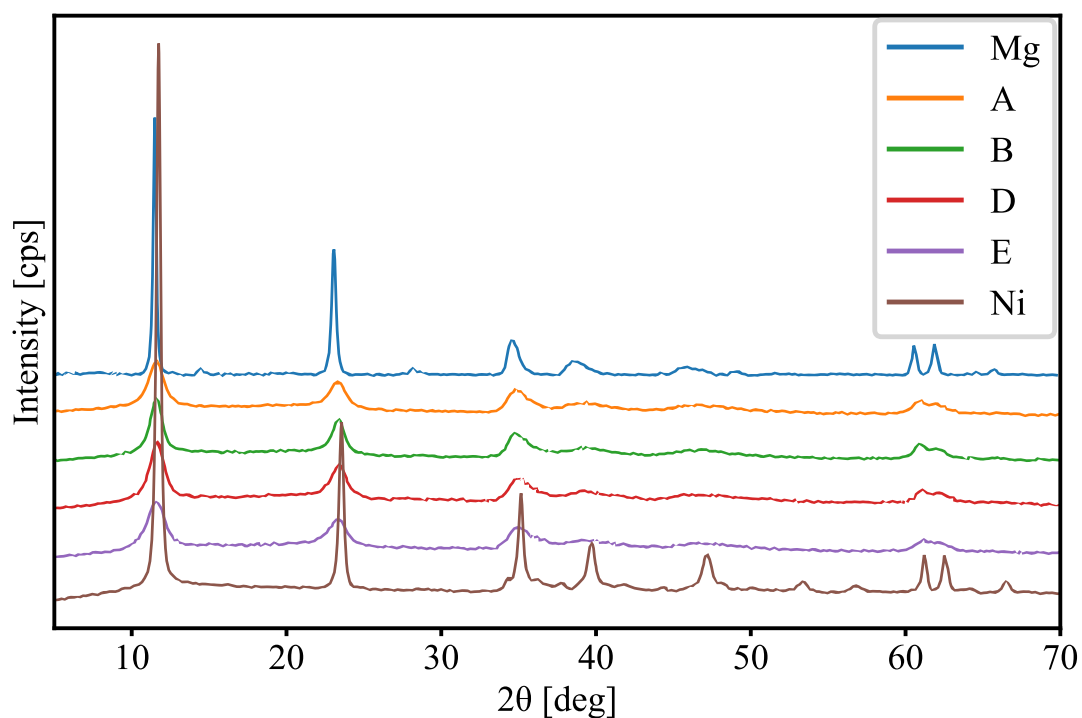

**Figure S1.** PXR D of the Mg<sub>2-x</sub>Ni<sub>x</sub>Al-LDH samples with  $x = 0.00$  (Mg), 0.16 (A), 0.34 (B), 0.68 (D), 0.84 (E), and 2 (Ni). The diffractograms were collected on a Rigaku Miniflex600 X-ray diffractometer with Cu K $\alpha$ 1 radiation (1.5405 Å). The data were obtained in the 2 $\theta$  range from 3 to 90° with a step size of 0.02° and a scan rate of 5 or 10°/min. The broad backgrounds for A, B, D, and E originates from the glass powder beds used due to limited sample volume.

**Table S1.** Optimised unit cell of the 1M structure.

| Real Lattice (Å) |            |            | Reciprocal Lattice (1/Å) |              |             |
|------------------|------------|------------|--------------------------|--------------|-------------|
| 5.3307860        | -9.1447812 | -0.0114838 | 0.591368842              | -0.342529859 | 0.142462751 |
| 5.2701643        | 9.1067742  | 0.0191709  | 0.593838093              | 0.345989634  | 0.141440601 |
| -1.7762937       | 0.0173788  | 7.4152542  | -0.000619428             | -0.001424967 | 0.847187385 |

| Lattice parameters (Å) |           | Cell Angles |            |
|------------------------|-----------|-------------|------------|
| a =                    | 10.585104 | Alpha =     | 96.484702  |
| b =                    | 10.521803 | beta =      | 96.911894  |
| c =                    | 7.625058  | gamma =     | 119.702462 |

|                       |                             |
|-----------------------|-----------------------------|
| Current cell volume = | 717.480159 Å <sup>3</sup>   |
| density =             | 1.308248 amu/Å <sup>3</sup> |
| =                     | 2.172397 g/cm <sup>3</sup>  |

86

|   |              |               |               |
|---|--------------|---------------|---------------|
| H | 2.6463303983 | 0.0873673371  | 1.7213664006  |
| H | 0.5993279618 | 0.0646410471  | 5.6466532230  |
| H | 7.8430883589 | -0.4580351365 | 1.7550058810  |
| H | 5.3037464457 | -4.3913554052 | 1.7278499517  |
| H | 5.2706016174 | 4.4786695651  | 1.7228595156  |
| H | 5.9024764371 | -0.2148877247 | 5.7314577528  |
| H | 3.2634614022 | -4.4109506036 | 5.6752655437  |
| H | 3.2728906219 | 4.5184844335  | 5.6887683699  |
| H | 2.4992834936 | 3.1179427752  | 1.7319553880  |
| H | 0.8591123858 | 3.1201476524  | 5.6746318989  |
| H | 0.8291609685 | -3.1290238626 | 5.6627730866  |
| H | 2.5087921175 | -3.1602358545 | 1.7051178655  |
| H | 7.7480469071 | 3.1183647772  | 1.7705494953  |
| H | 5.0437595770 | -1.4252799562 | 1.7677247738  |
| H | 5.1608206949 | 7.6199607519  | 1.6730720450  |
| H | 6.0738049602 | 3.2092178814  | 5.7193315125  |
| H | 3.3700183257 | -1.4035810853 | 5.6901255149  |
| H | 3.5408128988 | 7.6153250196  | 5.6680210219  |
| H | 6.1074289411 | -3.3148726919 | 5.7132827259  |
| H | 3.6243692997 | -7.6226923509 | 5.6012435828  |
| H | 3.5135034345 | 1.4126999360  | 5.7063005969  |
| H | 7.7566315713 | -3.3099081819 | 1.7254081001  |
| H | 5.2825577598 | -7.5690584262 | 1.6892934651  |
| H | 5.2015164602 | 1.3818251761  | 1.7683977522  |
| H | 3.5334044667 | -0.3776942149 | -0.0533161688 |
| H | 3.2180503657 | 1.2022223378  | -0.0484993138 |
| H | 9.2062671191 | 1.9542567388  | 0.0172990298  |
| H | 8.3834813815 | 1.2734840862  | 1.1456536223  |
| H | 6.5470453953 | 6.9939348538  | -0.0000546158 |
| H | 5.2385771644 | 6.1318870774  | -0.0163423766 |
| H | 8.0556700124 | -2.0527849068 | 0.0596680637  |
| H | 6.6007106539 | -1.5554416610 | 0.1066939962  |
| H | 6.6298603444 | -6.3578635085 | -0.0570166504 |
| H | 5.2857941919 | -5.5801380443 | -0.0398874327 |
| H | 6.6334115072 | 1.3410534807  | -0.0068048531 |
| H | 5.6055789752 | 0.1581555648  | 0.0137234227  |
| C | 3.5235464666 | 4.3154378279  | 0.0287289952  |
| C | 4.2081082052 | -2.8109567378 | -0.0034042311 |
| O | 2.4379875713 | 3.1336142668  | 2.7132624207  |
| O | 0.7802913891 | 3.1374664657  | 4.6933554282  |
| O | 0.8017562189 | -3.1393377604 | 4.6768003359  |
| O | 2.4698052045 | -3.1437458133 | 2.6887066431  |
| O | 7.7234127704 | 3.1306562397  | 2.7444822105  |
| O | 5.1203238431 | -1.4153370148 | 2.7482854556  |
| O | 5.0766184039 | 7.6904564569  | 2.6561681249  |
| O | 6.0929403083 | 3.1353972008  | 4.7541662657  |
| O | 3.4396479507 | -1.4211222852 | 4.7105329562  |
| O | 3.4392367622 | 7.6959233183  | 4.6861939996  |
| O | 6.1141044878 | -3.1843701189 | 4.7366384743  |
| O | 3.4905630804 | -7.7344018895 | 4.6410051520  |
| O | 3.4454540516 | 1.4129329248  | 4.7233659662  |
| O | 7.7403316233 | -3.1674330525 | 2.7009076176  |
| O | 5.1372862501 | -7.6934155836 | 2.6457934883  |
| O | 5.1185961733 | 1.4070233418  | 2.7491101171  |
| O | 2.6415949548 | 0.0074684348  | 2.7054804138  |
| O | 0.6019553115 | -0.0005810187 | 4.6613640124  |
| O | 7.9370963512 | -0.0132813821 | 2.6389617030  |
| O | 5.2974216693 | -4.5582790287 | 2.6957243187  |

|    |               |               |               |
|----|---------------|---------------|---------------|
| O  | 5.2815391635  | 4.5325581918  | 2.7089046677  |
| O  | 5.9198403534  | -0.0289614582 | 4.7697627406  |
| O  | 3.2747994930  | -4.5640226851 | 4.7043528793  |
| O  | 3.2663836269  | 4.5508608100  | 4.7021054814  |
| O  | 4.8117299506  | 4.4509226791  | 0.0126337278  |
| O  | 2.9895709551  | 3.1147544892  | 0.0083910335  |
| O  | 2.7487227104  | 5.3448938724  | 0.0459658559  |
| O  | 4.9845073082  | -3.8286936365 | -0.0107954743 |
| O  | 2.9258383812  | -2.9131543614 | -0.0296987719 |
| O  | 4.7553988269  | -1.5943575060 | 0.0242453544  |
| O  | 2.8009247253  | 0.3070804991  | -0.0393492979 |
| O  | 8.2850102893  | 1.8306952640  | 0.3413197494  |
| O  | 5.5625680360  | 7.0851230145  | -0.0263838170 |
| O  | 7.5323876546  | -1.2093583018 | 0.1221440316  |
| O  | 5.6359275294  | -6.5069559564 | -0.0793170944 |
| O  | 5.6653949580  | 1.1329532365  | 0.0144859365  |
| Mg | 1.6293764266  | 1.5209239169  | 3.7121578244  |
| Mg | 1.6264854698  | -1.5176757412 | 3.6642495696  |
| Mg | 6.9143432831  | 1.4896013585  | 3.7662928347  |
| Mg | 4.2900731522  | -3.0479747840 | 3.7335473463  |
| Mg | 4.2561126677  | 6.0632249972  | 3.6805230633  |
| Mg | 6.9299089675  | -1.5623590310 | 3.7663604843  |
| Mg | 4.3031985055  | -6.0712648962 | 3.6843179738  |
| Mg | 4.2604843991  | 3.0345838524  | 3.7135907189  |
| Al | -1.0091243524 | -0.0136703837 | 3.6365397755  |
| Al | 4.2689201233  | -0.0057404403 | 3.7302420314  |
| Al | 1.6379543088  | -4.5414239620 | 3.6934028357  |
| Al | 1.6142256016  | 4.5586452230  | 3.7098346191  |

**Table S2. Optimised unit cell of the 2T structure.**

| Real Lattice (Å) |            |            | Reciprocal Lattice (1/Å) |              |              |
|------------------|------------|------------|--------------------------|--------------|--------------|
| 9.1830756        | -5.3065451 | 0.0008811  | 0.684757970              | 0.000942022  | -0.000061789 |
| -0.0145659       | 10.5879796 | 0.0001429  | 0.343190975              | 0.593898404  | -0.000022911 |
| 0.0013534        | -0.0002036 | 14.9960022 | -0.000043505             | -0.000005714 | 0.418990693  |

  

| Lattice parameters (Å) |           | Cell Angles |            |
|------------------------|-----------|-------------|------------|
| a =                    | 10.606050 | Alpha =     | 90.000012  |
| b =                    | 10.587990 | beta =      | 89.990373  |
| c =                    | 14.996002 | gamma =     | 120.100782 |

  

|                       |                             |
|-----------------------|-----------------------------|
| Current cell volume = | 1456.905439 Å <sup>3</sup>  |
| density =             | 1.288542 amu/Å <sup>3</sup> |
| =                     | 2.139674 g/cm <sup>3</sup>  |

172

|   |               |               |               |
|---|---------------|---------------|---------------|
| H | 1.4643807781  | -0.7543344633 | 1.9717122619  |
| H | 4.6829594861  | 1.0176228654  | 9.5087219889  |
| H | 1.5105440548  | 4.6883722882  | 5.5042767812  |
| H | 3.2671760860  | 1.9441235405  | 5.5224237649  |
| H | 1.5145044728  | 0.9094825712  | 13.0130529635 |
| H | 0.2253943366  | 1.7201248169  | 5.5151233140  |
| H | 4.6194726633  | -0.8959629668 | 1.9566272759  |
| H | 0.2251324623  | 3.6838857833  | 12.9970720607 |
| H | 3.1813537046  | -1.7442555852 | 9.4680000792  |
| H | 3.2767266062  | 3.5474661472  | 13.0108302015 |
| H | 3.2665840929  | 1.9441454592  | 1.9644391753  |
| H | 1.5132666566  | 0.9094125831  | 9.4694309850  |
| H | 6.0716760070  | 1.8133838124  | 1.9361928220  |
| H | 6.0562046504  | -3.3078793198 | 2.0002227788  |
| H | 1.5098693181  | 4.6885621215  | 1.9821658600  |
| H | 9.2901190158  | 3.7780627978  | 9.4853658092  |
| H | 9.4074085450  | -1.6226926284 | 9.4861419760  |
| H | 4.5714013160  | 6.3500074864  | 9.4339915562  |
| H | 6.0423449859  | 7.2800359421  | 5.4869791950  |
| H | 6.0722973344  | 1.8135107795  | 5.5510975448  |
| H | 1.4504714273  | 9.8336030117  | 5.5147433680  |
| H | 7.8353787704  | 4.4117756790  | 5.5099721795  |
| H | 7.9402203095  | -0.8549456717 | 5.5461829091  |
| H | 3.1419102169  | 7.2308075701  | 5.4797274663  |
| H | 5.9959747361  | 3.6137037133  | 12.9924227662 |
| H | 6.0648372784  | -1.9226980686 | 13.0062084885 |
| H | 1.5352148613  | 6.2550269949  | 13.0136994093 |
| H | 4.6927283804  | 4.2907234751  | 5.4937231046  |
| H | 4.6201374226  | -0.8960424700 | 5.5303258493  |
| H | -0.0682978514 | 6.9883994311  | 5.5395532368  |
| H | 9.1141809943  | 1.6819347088  | 1.9476500790  |
| H | 9.4076404504  | -3.5862989522 | 1.9718749492  |
| H | 4.6918285725  | 4.2910329194  | 1.9933756250  |
| H | 4.5723856525  | 6.3501958153  | 13.0491124234 |
| H | 4.6839407143  | 1.0175003540  | 12.9743232965 |
| H | 0.1078098189  | 9.0844013411  | 12.9978326160 |
| H | 7.9047193728  | 0.9198287577  | 9.5144142664  |
| H | 7.8129355916  | -4.4478667721 | 9.4534522131  |
| H | 3.2759308070  | 3.5477849386  | 9.4720270212  |
| H | 7.7993377605  | 6.1402951616  | 13.0302060955 |
| H | 7.9057922084  | 0.9198169858  | 12.9694107683 |
| H | 3.1677241288  | 8.8437912298  | 13.0148069843 |
| H | 7.8346870795  | 4.4119002802  | 1.9776596506  |
| H | 7.9392277933  | -0.8546390317 | 1.9415927016  |
| H | 3.1411254715  | 7.2308667932  | 2.0070779201  |
| H | 5.9951645051  | 3.6135490652  | 9.4910557354  |
| H | 6.0637972272  | -1.9226965644 | 9.4770046973  |
| H | 1.5344386897  | 6.2549658051  | 9.4688808562  |
| H | 4.9351024571  | 0.3300512178  | 3.7434712146  |
| H | 3.4747821003  | -0.3336167053 | 3.7435808165  |
| H | 9.2059508045  | -0.6958801080 | 3.7438716450  |
| H | 8.8912856603  | -2.2119579614 | 3.7441073623  |
| H | 1.7619528073  | 8.6739501553  | 3.7432691175  |
| H | 0.3493446464  | 9.5031486482  | 3.7434837050  |
| H | 6.8084317160  | 8.4208430771  | 3.7436195165  |
| H | 5.2704097144  | 8.4657172182  | 3.7436690125  |
| H | 7.9769927116  | 3.0027047348  | 3.7437691501  |
| H | 6.6549169584  | 3.9128460164  | 3.7438696080  |

|   |              |               |               |
|---|--------------|---------------|---------------|
| H | 1.7916657099 | 2.1950187487  | 3.7431166972  |
| H | 1.0986801893 | 0.7991185442  | 3.7430274095  |
| H | 6.9286408922 | -2.9978315246 | 11.2417631073 |
| H | 5.4159748637 | -3.2057989241 | 11.2417973221 |
| H | 2.7747329563 | 6.2234380194  | 11.2415035602 |
| H | 1.9972847346 | 7.5827743151  | 11.2416705879 |
| H | 9.2875269746 | 1.1092800620  | 11.2421592949 |
| H | 8.3251127396 | 2.2895632939  | 11.2422008368 |
| H | 8.4800124626 | 5.3001980092  | 11.2419443737 |
| H | 6.8868079789 | 5.3177019979  | 11.2420987527 |
| H | 5.5160896011 | -0.3481752637 | 11.2418576967 |
| H | 3.9750390176 | -0.2296434974 | 11.2419108301 |
| H | 0.9516032921 | 2.3616767559  | 11.2415068722 |
| H | 1.7415572798 | 3.6974759878  | 11.2414726992 |
| C | 1.2833423081 | 6.5547971142  | 3.7430690187  |
| C | 4.5325471622 | 4.6765342681  | 11.2417743020 |
| C | 4.7176303135 | 2.5739528775  | 3.7435991541  |
| C | 1.5696007700 | -0.6401385449 | 11.2413881899 |
| O | 1.4996513502 | -0.7417839394 | 0.99880472274 |
| O | 4.6483634561 | 1.0720469494  | 8.5257435651  |
| O | 1.4761401484 | 4.5468057268  | 6.4770967616  |
| O | 3.2385892170 | 1.8821701872  | 6.5028976685  |
| O | 1.4904790930 | 0.9023526816  | 13.9952196595 |
| O | 0.0678571245 | 1.7191089830  | 6.4813791156  |
| O | 4.6638736918 | -0.9308930247 | 0.9754081093  |
| O | 0.0815160063 | 3.7159234970  | 13.9707192810 |
| O | 3.2276576593 | -1.7730851342 | 8.4900696634  |
| O | 3.2292417461 | 3.5436480205  | 13.9932544670 |
| O | 3.2378546889 | 1.8822428011  | 0.9839720434  |
| O | 1.4893681995 | 0.9023394336  | 8.4872635591  |
| O | 6.0924534251 | 1.8812078067  | 0.9568295589  |
| O | 6.0789248407 | -3.4015523276 | 1.0192043421  |
| O | 1.4753218904 | 4.5469581887  | 1.0093443604  |
| O | 9.2425860131 | 3.7137310225  | 8.5063613671  |
| O | 9.2637475052 | -1.5906762183 | 8.5125246372  |
| O | 4.6429965504 | 6.3590116983  | 8.4566842279  |
| O | 6.0651191013 | 7.1862662469  | 6.4680036407  |
| O | 6.0931187361 | 1.8812225456  | 6.5304930639  |
| O | 1.4857820776 | 9.8461635781  | 6.4984104178  |
| O | 7.8253324551 | 4.5134509525  | 6.4898410335  |
| O | 7.8241282969 | -0.7612099162 | 6.5159525288  |
| O | 3.2146996867 | 7.1969440393  | 6.4572375562  |
| O | 6.0733103847 | 3.5405072356  | 13.9693600502 |
| O | 6.0739932038 | -1.7793189792 | 13.9783880269 |
| O | 1.4989725589 | 6.1910162647  | 13.9951979349 |
| O | 4.6502252329 | 4.3414085999  | 6.4754102969  |
| O | 4.6645712195 | -0.9309869398 | 6.5115312160  |
| O | 0.0370130440 | 7.0087220026  | 6.5175382664  |
| O | 9.2193483613 | 1.7022713932  | 0.9696598013  |
| O | 9.2501118573 | -3.5872418355 | 1.0056126249  |
| O | 4.6493961302 | 4.3415928170  | 1.0116901071  |
| O | 4.6440185516 | 6.3591353975  | 14.0264052659 |
| O | 4.6494109177 | 1.0719553865  | 13.9573412600 |
| O | 0.0606092907 | 9.0200991663  | 13.9768552720 |
| O | 7.8232063892 | 0.8640851725  | 8.5348842191  |
| O | 7.8234009427 | -4.4113483872 | 8.4676719116  |
| O | 3.2283436040 | 3.5437461709  | 8.4896290054  |
| O | 7.8098945269 | 6.1767385893  | 14.0159846594 |
| O | 7.8242716016 | 0.8639847819  | 13.9489577831 |
| O | 3.2141686921 | 8.8148617918  | 13.9927091557 |
| O | 7.8245770816 | 4.5135454681  | 0.9978186232  |
| O | 7.8232484670 | -0.7609972112 | 0.9718272709  |
| O | 3.2139928189 | 7.1970798324  | 1.0295459450  |
| O | 6.0722865161 | 3.5406025280  | 8.5141087378  |
| O | 6.0729149296 | -1.7794053140 | 8.5048349349  |
| O | 1.4980614382 | 6.1910526496  | 8.4873840682  |
| O | 2.6208086707 | -1.4108575000 | 11.2416782177 |
| O | 4.3378988420 | 5.9848129109  | 11.2416665060 |
| O | 0.3827559564 | -1.1914591027 | 11.2410401649 |
| O | 1.6982928656 | 0.6369563871  | 11.2413038880 |
| O | 3.5184165526 | 3.8904605342  | 11.2415987085 |
| O | 5.7391978653 | 4.2195089595  | 11.2421088841 |
| O | 7.6948071023 | 5.9412206100  | 11.2419052341 |
| O | 1.8239622592 | 6.5935870244  | 11.2416064304 |
| O | 8.3139197821 | 1.3114540613  | 11.2422575710 |
| O | 6.0917845490 | -2.4702058591 | 11.2419563479 |
| O | 2.2883408910 | 7.3984817082  | 3.7431708484  |

|    |              |               |               |
|----|--------------|---------------|---------------|
| O  | 0.0656377152 | 6.9945325959  | 3.7430756404  |
| O  | 5.6405886036 | 1.6432922634  | 3.7436619375  |
| O  | 1.5084330600 | 5.2846791421  | 3.7429520777  |
| O  | 3.4746284839 | 2.2182976382  | 3.7435307568  |
| O  | 5.0722415199 | 3.8147601195  | 3.7437435370  |
| O  | 8.4186418723 | -1.3455669132 | 3.7439787082  |
| O  | 1.3171500357 | 9.6825845587  | 3.7434322993  |
| O  | 4.4160760175 | -0.5851950843 | 3.7433959679  |
| O  | 7.6824222399 | 3.9449710667  | 3.7438924915  |
| O  | 0.8893716081 | 1.7708845720  | 3.7430477781  |
| O  | 6.0227166540 | 7.8232558866  | 3.7436042516  |
| O  | 4.8054908529 | 0.3207310811  | 11.2418914763 |
| O  | 0.8153770285 | 3.3396734724  | 11.2415336480 |
| Mg | 1.6035949728 | 2.7227555213  | 14.9973585085 |
| Mg | 1.6028432010 | 2.7228003047  | 7.4852241039  |
| Mg | 3.1312401364 | 0.0719159673  | 7.5135136549  |
| Mg | 3.1306830949 | 0.0720249574  | -0.0268256594 |
| Mg | 6.1814686915 | 5.3526031683  | 15.0381634714 |
| Mg | 6.1884889449 | 0.0606072827  | 14.9428296598 |
| Mg | 1.5813018137 | 8.0106605107  | 15.0076345228 |
| Mg | 6.1806440655 | 5.3526662686  | 7.4451725021  |
| Mg | 6.1876557226 | 0.0606027568  | 7.5403153300  |
| Mg | 1.5804755654 | 8.0107671022  | 7.4749241013  |
| Mg | 7.7083822701 | 2.7035489412  | 7.5426253405  |
| Mg | 7.7199099703 | -2.5889304592 | 7.4989152006  |
| Mg | 3.1202119250 | 5.3579700291  | 7.4497195740  |
| Mg | 7.7078799475 | 2.7036752912  | -0.0549094556 |
| Mg | 7.7193778617 | -2.5887660248 | -0.0113297542 |
| Mg | 3.1196099966 | 5.3581823719  | 0.0368599452  |
| Al | 0.0686264799 | 0.0720329335  | 0.0003845073  |
| Al | 0.0691538243 | 0.0719028913  | 7.4856815521  |
| Al | 4.6547669332 | 2.7097028835  | -0.0292108829 |
| Al | 4.6592080456 | -2.5845612153 | 0.0160625113  |
| Al | 0.0629683558 | 5.36444481378 | -0.0352116124 |
| Al | 4.6553101772 | 2.7095649618  | 7.5163643915  |
| Al | 4.6597668461 | -2.5847121184 | 7.4708862279  |
| Al | 0.0635183689 | 5.3642524239  | 7.5215704346  |

## Construction and optimisation of the finite cluster models for Ni<sup>2+</sup> susceptibility

The fractional nuclear charges and number of electrons for each of the pseudohydrogen were fixed so that the formal valence of all the real cluster atoms was retained, despite that the bonds to the next LDH atoms at the perimeter of the cluster were removed. The atomic structures for the three models are displayed in Figure S2, Table S3 summarises the number of atoms and electrons for each, and the coordinates for the clusters are presented in Tables S4, S5 and S6. The resulting, terminated cluster models were geometry-optimised using the Turbomole code<sup>1</sup> at the DFT level with the PBE0 functional,<sup>2</sup> empirical D3(BJ) dispersion corrections,<sup>3,4</sup> and the Stuttgart-Cologne quasirelativistic ECP10MDF effective core potentials<sup>5</sup> with corresponding valence basis sets applied to the metal sites, def2-TZVP all-electron basis set<sup>6</sup> to the other real atoms of the system, and def2-SV(P) for the terminating pseudohydrogens. The pseudohydrogen positions were kept fixed while the positions of the real cluster atoms were relaxed.



**Figure S2.** Atomic structure of the (a) small, (b) medium and (c) large cluster models of the paramagnetic Ni centre in the LDH layer. Ni in yellow, Al in cyan, Mg in grey, O in red and H in white.

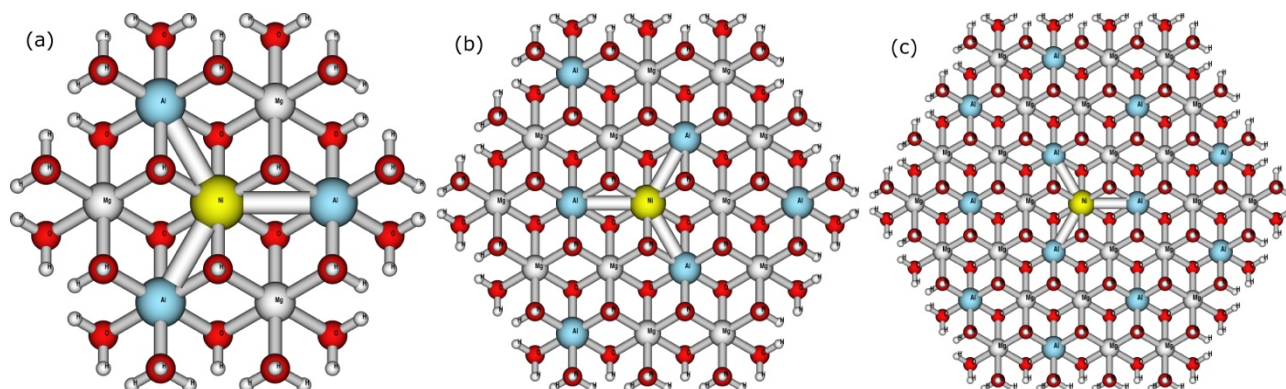

**Table S3.** The number of real atoms  $N_{\text{at}}$ , the number of electrons  $N_e$ , the number of each element  $N_{\text{Ni/Al/Mg/O/H}}$ , the number of pseudohydrogen termination atoms  $N_{\text{H}^*}$  and the total charge  $q$  in the cluster models of the paramagnetic Ni centre in the LDH layer.

| Model  | $N_{\text{at}}$ | $N_e$ | $N_{\text{Ni}}$ | $N_{\text{Al}}$ | $N_{\text{Mg}}$ | $N_{\text{O}}$ | $N_{\text{H}}$ | $N_{\text{H}^*}$ | $q / e$ |
|--------|-----------------|-------|-----------------|-----------------|-----------------|----------------|----------------|------------------|---------|
| small  | 55              | 326   | 1               | 3               | 3               | 24             | 24             | 30               | +3      |
| medium | 175             | 746   | 1               | 6               | 12              | 54             | 54             | 48               | +6      |
| large  | 295             | 1346  | 1               | 12              | 24              | 96             | 96             | 66               | +12     |

**Table S4.** Coordinates (.xyz format, in Å) of the small cluster model of Fig. S2(a) used in the calculation of the susceptibility of the paramagnetic Ni<sup>2+</sup> site. The entries "z 0.33333" occurring after the coordinates of the pseudohydrogen centres indicate modified nuclear charge.

| Atom | x        | y        | z        | charge    |
|------|----------|----------|----------|-----------|
| O    | -3.52646 | 0.00000  | -0.99831 |           |
| O    | -1.76323 | 3.05400  | 0.99832  |           |
| O    | -3.52646 | 3.05400  | -0.99831 |           |
| O    | -3.52646 | -3.05400 | -0.99831 |           |
| O    | 1.76322  | -3.05400 | -0.99831 |           |
| H    | 0.88161  | 1.52700  | 1.84913  |           |
| H    | 0.88161  | -1.52700 | 1.84913  |           |
| H    | -0.88162 | 1.52700  | -1.84913 |           |
| H    | -0.88162 | -1.52700 | -1.84913 |           |
| O    | 1.76322  | 0.00000  | -0.99831 |           |
| O    | 0.88161  | -4.58100 | 0.99832  |           |
| O    | 0.88161  | -1.52700 | 0.99832  |           |
| O    | 3.52645  | 3.05400  | 0.99832  |           |
| H    | -1.76323 | 0.00000  | 1.84913  |           |
| O    | 3.52645  | 0.00000  | 0.99832  |           |
| O    | 3.52645  | -3.05400 | 0.99832  |           |
| Al   | 0.00000  | -3.05400 | 0.00000  |           |
| O    | -1.76323 | 0.00000  | 0.99832  |           |
| O    | -1.76323 | -3.05400 | 0.99832  |           |
| O    | 1.76322  | 3.05400  | -0.99831 |           |
| O    | -4.40807 | -1.52700 | 0.99832  |           |
| O    | -4.40807 | 1.52700  | 0.99832  |           |
| Ni   | 0.00000  | 0.00000  | 0.00000  |           |
| O    | 0.88161  | 1.52700  | 0.99832  |           |
| Mg   | 0.00000  | 3.05400  | 0.00000  |           |
| H    | 1.76322  | 0.00000  | -1.84913 |           |
| O    | 4.40807  | -1.52700 | -0.99831 |           |
| Al   | 2.64484  | 1.52700  | 0.00000  |           |
| Mg   | 2.64484  | -1.52700 | 0.00000  |           |
| Mg   | -2.64485 | -1.52700 | 0.00000  |           |
| Al   | -2.64485 | 1.52700  | 0.00000  |           |
| O    | -0.88162 | 4.58100  | -0.99831 |           |
| O    | -0.88162 | -1.52700 | -0.99831 |           |
| O    | -0.88162 | 1.52700  | -0.99831 |           |
| O    | -0.88162 | -4.58100 | -0.99831 |           |
| O    | 0.88161  | 4.58100  | 0.99832  |           |
| O    | 4.40807  | 1.52700  | -0.99831 |           |
| H    | -4.40536 | 0.00000  | -0.50069 | z 0.33333 |
| H    | -3.52646 | 0.00000  | -2.00831 |           |
| H    | -1.76323 | 3.05400  | 2.00832  |           |
| H    | -2.20268 | 3.81515  | 0.50070  | z 0.33333 |
| H    | -4.40536 | 3.05400  | -0.50069 | z 0.33333 |
| H    | -3.08701 | 3.81515  | -0.50069 | z 0.33333 |
| H    | -3.52646 | 3.05400  | -2.0083  |           |
| H    | 1.76322  | -3.05400 | -2.00831 |           |
| H    | 2.20267  | -3.81515 | -0.50069 | z 0.33333 |
| H    | -4.84752 | 0.76585  | 0.50070  | z 0.33333 |
| H    | -4.40807 | 1.52700  | 2.00832  |           |
| H    | -4.84752 | 2.28815  | 0.50070  | z 0.33333 |
| H    | 0.44216  | -5.34215 | 0.50069  | z 0.33333 |
| H    | 1.76051  | -4.58100 | 0.50070  | z 0.33333 |
| H    | 0.88161  | -4.58100 | 2.00832  |           |
| H    | -3.52646 | -3.05400 | -2.00831 |           |
| H    | -3.08701 | -3.81515 | -0.50069 | z 0.33333 |
| H    | -4.40536 | -3.05400 | -0.50069 | z 0.33333 |
| H    | 3.52645  | 0.00000  | 2.00832  |           |
| H    | 4.40535  | 0.00000  | 0.50070  | z 0.33333 |
| H    | -4.84752 | -0.76585 | 0.50070  | z 0.33333 |
| H    | -4.40807 | -1.52700 | 2.00832  |           |
| H    | -4.84752 | -2.28815 | 0.50070  | z 0.33333 |
| H    | 1.76322  | 3.05400  | -2.00831 |           |
| H    | 2.20267  | 3.81515  | -0.50069 | z 0.33333 |
| H    | 0.44216  | 5.34215  | 0.50069  | z 0.33333 |
| H    | 0.88161  | 4.58100  | 2.00832  |           |
| H    | 1.76051  | 4.58100  | 0.50070  | z 0.33333 |
| H    | -0.44217 | 5.34215  | -0.50069 | z 0.33333 |

|   |          |          |          |           |
|---|----------|----------|----------|-----------|
| H | -0.88162 | 4.58100  | -2.00831 |           |
| H | -1.76052 | 4.58100  | -0.50069 | z 0.33333 |
| H | 3.08700  | -3.81515 | 0.50069  | z 0.33333 |
| H | 3.52645  | -3.05400 | 2.00832  |           |
| H | 4.40535  | -3.05400 | 0.50070  | z 0.33333 |
| H | 3.52645  | 3.05400  | 2.00832  |           |
| H | 4.40535  | 3.05400  | 0.50070  | z 0.33333 |
| H | 3.08700  | 3.81515  | 0.50069  | z 0.33333 |
| H | -0.44217 | -5.34215 | -0.50069 | z 0.33333 |
| H | -1.76052 | -4.58100 | -0.50069 | z 0.33333 |
| H | -0.88162 | -4.58100 | -2.00831 |           |
| H | 4.84752  | -2.28815 | -0.50069 | z 0.33333 |
| H | 4.84752  | -0.76585 | -0.50069 | z 0.33333 |
| H | 4.40807  | -1.52700 | -2.00831 |           |
| H | -1.76323 | -3.05400 | 2.00832  |           |
| H | -2.20268 | -3.81515 | 0.50070  | z 0.33333 |
| H | 4.84752  | 2.28815  | -0.50069 | z 0.33333 |
| H | 4.84752  | 0.76585  | -0.50069 | z 0.33333 |
| H | 4.40807  | 1.52700  | -2.00831 |           |

**Table S5.** Coordinates (.xyz format, in Å) of the medium cluster model of Fig. S2(b) used in the calculation of the susceptibility of the paramagnetic Ni<sup>2+</sup> site. The entries "z 0.33333" occurring after the coordinates of the pseudohydrogen centres indicate modified nuclear charge.

```

175
Atom      x          y          z          charge
O         7.0529100  0.0000000 -0.9983100
H         3.5264500  0.0000000  1.8491300
H         1.7632200  0.0000000 -1.8491300
H        -1.7632300  0.0000000  1.8491300
H         3.5264500  3.0540000  1.8491300
O         3.5264500  3.0540000  0.9983200
H         3.5264500 -3.0540000  1.8491300
O         3.5264500  6.1080000  0.9983200
O        -1.7632300 -6.1080000  0.9983200
O         6.1712900  4.5810000  0.9983200
H        -0.8816200  1.5270000 -1.8491300
O        -3.5264600 -6.1080000 -0.9983100
O        -0.8816200  1.5270000 -0.9983100
O        -4.4080700  1.5270000  0.9983200
O        -0.8816200  4.5810000 -0.9983100
O        -0.8816200  7.6350000 -0.9983100
H         4.4080700 -1.5270000 -1.8491300
H        -3.5264600  3.0540000 -1.8491300
H        -3.5264600  0.0000000 -1.8491300
O         4.4080700  4.5810000 -0.9983100
H        -4.4080700 -1.5270000  1.8491300
O         4.4080700 -1.5270000 -0.9983100
O        -7.0529100 -3.0540000  0.9983200
O        -7.0529100  3.0540000  0.9983200
O         0.8816100  1.5270000  0.9983200
H        -4.4080700  1.5270000  1.8491300
O         4.4080700  1.5270000 -0.9983100
O        -3.5264600  3.0540000 -0.9983100
O         0.8816100  4.5810000  0.9983200
O         0.8816100 -1.5270000  0.9983200
O         0.8816100 -7.6350000  0.9983200
O         7.0529100  3.0540000 -0.9983100
H        -1.7632300  3.0540000  1.8491300
O         7.0529100 -3.0540000 -0.9983100
H         1.7632200  3.0540000 -1.8491300
H         1.7632200 -3.0540000 -1.8491300
O        -6.1713000 -4.5810000 -0.9983100
O        -6.1713000  1.5270000 -0.9983100
O         3.5264500 -3.0540000  0.9983200
H        -0.8816200  4.5810000 -1.8491300
H        -0.8816200 -1.5270000 -1.8491300
H        -0.8816200 -4.5810000 -1.8491300
O         3.5264500  0.0000000  0.9983200
Al         0.0000000  3.0540000  0.0000000
Ni         0.0000000  0.0000000  0.0000000
O        -1.7632300  6.1080000  0.9983200
O        -1.7632300 -3.0540000  0.9983200
Mg         0.0000000  6.1080000  0.0000000
Mg         0.0000000 -3.0540000  0.0000000
O        -4.4080700 -4.5810000  0.9983200
O        -0.8816200 -4.5810000 -0.9983100
Al         0.0000000 -6.1080000  0.0000000
O        -1.7632300  3.0540000  0.9983200
O        -1.7632300  0.0000000  0.9983200
O         6.1712900 -4.5810000  0.9983200
O         6.1712900 -1.5270000  0.9983200
H         4.4080700  1.5270000 -1.8491300
O        -6.1713000  4.5810000 -0.9983100
H        -3.5264600 -3.0540000 -1.8491300
O        -4.4080700 -1.5270000  0.9983200
O         0.8816100 -4.5810000  0.9983200
O        -4.4080700  4.5810000  0.9983200
O         3.5264500 -6.1080000  0.9983200
O        -0.8816200 -7.6350000 -0.9983100
Mg         2.6448400  4.5810000  0.0000000
Al         2.6448400 -1.5270000  0.0000000

```

|    |            |            |            |           |
|----|------------|------------|------------|-----------|
| Mg | 2.6448400  | 1.5270000  | 0.0000000  |           |
| Mg | 2.6448400  | -4.5810000 | 0.0000000  |           |
| O  | -3.5264600 | 6.1080000  | -0.9983100 |           |
| Mg | 5.2896800  | 0.0000000  | 0.0000000  |           |
| Mg | -2.6448500 | 4.5810000  | 0.0000000  |           |
| Al | -2.6448500 | -1.5270000 | 0.0000000  |           |
| Mg | -2.6448500 | 1.5270000  | 0.0000000  |           |
| O  | -0.8816200 | -1.5270000 | -0.9983100 |           |
| Mg | -2.6448500 | -4.5810000 | 0.0000000  |           |
| Mg | -5.2896900 | 0.0000000  | 0.0000000  |           |
| H  | 0.8816100  | 1.5270000  | 1.8491300  |           |
| Mg | 5.2896800  | -3.0540000 | 0.0000000  |           |
| H  | 0.8816100  | -4.5810000 | 1.8491300  |           |
| H  | 0.8816100  | -1.5270000 | 1.8491300  |           |
| Al | 5.2896800  | 3.0540000  | 0.0000000  |           |
| H  | 0.8816100  | 4.5810000  | 1.8491300  |           |
| Al | -5.2896900 | 3.0540000  | 0.0000000  |           |
| O  | -3.5264600 | -3.0540000 | -0.9983100 |           |
| O  | -3.5264600 | 0.0000000  | -0.9983100 |           |
| O  | -7.0529100 | 0.0000000  | 0.9983200  |           |
| Mg | -5.2896900 | -3.0540000 | 0.0000000  |           |
| H  | -1.7632300 | -3.0540000 | 1.8491300  |           |
| O  | -6.1713000 | -1.5270000 | -0.9983100 |           |
| O  | 1.7632200  | -3.0540000 | -0.9983100 |           |
| O  | 1.7632200  | 3.0540000  | -0.9983100 |           |
| O  | 1.7632200  | 0.0000000  | -0.9983100 |           |
| O  | 1.7632200  | 6.1080000  | -0.9983100 |           |
| O  | 1.7632200  | -6.1080000 | -0.9983100 |           |
| O  | 4.4080700  | -4.5810000 | -0.9983100 |           |
| O  | 0.8816100  | 7.6350000  | 0.9983200  |           |
| O  | 6.1712900  | 1.5270000  | 0.9983200  |           |
| H  | 4.4053527  | 6.1080000  | 0.5006957  | z 0.33333 |
| H  | 3.0870003  | 6.8691525  | 0.5006948  | z 0.33333 |
| H  | 3.5264500  | 6.1080000  | 2.0083200  |           |
| H  | -2.2026837 | -6.8691509 | 0.5006958  | z 0.33333 |
| H  | -1.7632300 | -6.1080000 | 2.0083200  |           |
| H  | 6.1712900  | 4.5810000  | 2.0083200  |           |
| H  | 5.7318403  | 5.3421525  | 0.5006948  | z 0.33333 |
| H  | 7.0501927  | 4.5810000  | 0.5006957  | z 0.33333 |
| H  | -4.8475237 | -5.3421509 | 0.5006958  | z 0.33333 |
| H  | -4.4080700 | -4.5810000 | 2.0083200  |           |
| H  | -4.8475237 | 5.3421509  | 0.5006958  | z 0.33333 |
| H  | -4.4080700 | 4.5810000  | 2.0083200  |           |
| H  | -0.8816200 | 7.6350000  | -2.0083100 |           |
| H  | -1.7605249 | 7.6350000  | -0.5006894 | z 0.33333 |
| H  | -0.4421652 | 8.3961527  | -0.5006896 | z 0.33333 |
| H  | -1.7605249 | -7.6350000 | -0.5006894 | z 0.33333 |
| H  | -0.4421652 | -8.3961527 | -0.5006896 | z 0.33333 |
| H  | -0.8816200 | -7.6350000 | -2.0083100 |           |
| H  | 3.5264500  | -6.1080000 | 2.0083200  |           |
| H  | 4.4053527  | -6.1080000 | 0.5006957  | z 0.33333 |
| H  | 3.0870003  | -6.8691525 | 0.5006948  | z 0.33333 |
| H  | 4.4080700  | 4.5810000  | -2.0083100 |           |
| H  | 4.8475207  | 5.3421543  | -0.5006885 | z 0.33333 |
| H  | -7.4923637 | -0.7611509 | 0.5006958  | z 0.33333 |
| H  | -7.0529100 | 0.0000000  | 2.0083200  |           |
| H  | -7.4923637 | 0.7611509  | 0.5006958  | z 0.33333 |
| H  | -7.4923637 | -3.8151509 | 0.5006958  | z 0.33333 |
| H  | -7.4923637 | -2.2928491 | 0.5006958  | z 0.33333 |
| H  | -7.0529100 | -3.0540000 | 2.0083200  |           |
| H  | -7.4923637 | 3.8151509  | 0.5006958  | z 0.33333 |
| H  | -7.0529100 | 3.0540000  | 2.0083200  |           |
| H  | -7.4923637 | 2.2928491  | 0.5006958  | z 0.33333 |
| H  | 4.8475207  | -5.3421543 | -0.5006885 | z 0.33333 |
| H  | 4.4080700  | -4.5810000 | -2.0083100 |           |
| H  | -3.5264600 | -6.1080000 | -2.0083100 |           |
| H  | -3.0870093 | -6.8691543 | -0.5006885 | z 0.33333 |
| H  | -4.4053649 | -6.1080000 | -0.5006894 | z 0.33333 |
| H  | -3.5264600 | 6.1080000  | -2.0083100 |           |
| H  | -4.4053649 | 6.1080000  | -0.5006894 | z 0.33333 |
| H  | -3.0870093 | 6.8691543  | -0.5006885 | z 0.33333 |
| H  | 7.4923607  | 3.8151543  | -0.5006885 | z 0.33333 |
| H  | 7.4923607  | 2.2928457  | -0.5006885 | z 0.33333 |
| H  | 7.0529100  | 3.0540000  | -2.0083100 |           |
| H  | 7.0529100  | 0.0000000  | -2.0083100 |           |
| H  | 7.4923607  | -0.7611543 | -0.5006885 | z 0.33333 |
| H  | 7.4923607  | 0.7611543  | -0.5006885 | z 0.33333 |

|   |            |            |            |   |         |
|---|------------|------------|------------|---|---------|
| H | 7.4923607  | -2.2928457 | -0.5006885 | z | 0.33333 |
| H | 7.4923607  | -3.8151543 | -0.5006885 | z | 0.33333 |
| H | 7.0529100  | -3.0540000 | -2.0083100 |   |         |
| H | -6.1713000 | 1.5270000  | -2.0083100 |   |         |
| H | -7.0502049 | 1.5270000  | -0.5006894 | z | 0.33333 |
| H | -6.1713000 | -4.5810000 | -2.0083100 |   |         |
| H | -7.0502049 | -4.5810000 | -0.5006894 | z | 0.33333 |
| H | -5.7318493 | -5.3421543 | -0.5006885 | z | 0.33333 |
| H | -5.7318493 | 5.3421543  | -0.5006885 | z | 0.33333 |
| H | -6.1713000 | 4.5810000  | -2.0083100 |   |         |
| H | -7.0502049 | 4.5810000  | -0.5006894 | z | 0.33333 |
| H | -7.0502049 | -1.5270000 | -0.5006894 | z | 0.33333 |
| H | -6.1713000 | -1.5270000 | -2.0083100 |   |         |
| H | -2.2026837 | 6.8691509  | 0.5006958  | z | 0.33333 |
| H | -1.7632300 | 6.1080000  | 2.0083200  |   |         |
| H | 2.2026748  | 6.8691527  | -0.5006896 | z | 0.33333 |
| H | 1.7632200  | 6.1080000  | -2.0083100 |   |         |
| H | 1.7632200  | -6.1080000 | -2.0083100 |   |         |
| H | 2.2026748  | -6.8691527 | -0.5006896 | z | 0.33333 |
| H | 6.1712900  | -4.5810000 | 2.0083200  |   |         |
| H | 7.0501927  | -4.5810000 | 0.5006957  | z | 0.33333 |
| H | 5.7318403  | -5.3421525 | 0.5006948  | z | 0.33333 |
| H | 7.0501927  | -1.5270000 | 0.5006957  | z | 0.33333 |
| H | 6.1712900  | -1.5270000 | 2.0083200  |   |         |
| H | 0.8816100  | 7.6350000  | 2.0083200  |   |         |
| H | 1.7605127  | 7.6350000  | 0.5006957  | z | 0.33333 |
| H | 0.4421603  | 8.3961525  | 0.5006948  | z | 0.33333 |
| H | 0.8816100  | -7.6350000 | 2.0083200  |   |         |
| H | 0.4421603  | -8.3961525 | 0.5006948  | z | 0.33333 |
| H | 1.7605127  | -7.6350000 | 0.5006957  | z | 0.33333 |
| H | 7.0501927  | 1.5270000  | 0.5006957  | z | 0.33333 |
| H | 6.1712900  | 1.5270000  | 2.0083200  |   |         |

**Table S6.** Coordinates (.xyz format, in Å) of the medium cluster model of Fig. S2(c) used in the calculation of the susceptibility of the paramagnetic Ni<sup>2+</sup> site. The entries "z 0.33333" occurring after the coordinates of the pseudohydrogen centres indicate modified nuclear charge.

```

295
Atom      x          y          z          charge
H    -0.8816100  7.6350000 -1.8491300
O     9.6977600 -4.5810000 -0.9983200
O    -3.5264500  0.0000000 -0.9983200
H    -3.5264500  6.1080000 -1.8491300
O    -3.5264500  6.1080000 -0.9983200
O    -3.5264500 -9.1620000 -0.9983200
O     1.7632300  0.0000000 -0.9983200
H    -0.8816100  1.5270000 -1.8491300
O     1.7632300  6.1080000 -0.9983200
O     4.4080700 -7.6350000 -0.9983200
O     1.7632300 -9.1620000 -0.9983200
Mg   -7.9345200 -1.5270000  0.0000000
O    -6.1712900  4.5810000 -0.9983200
O    -6.1712900 -7.6350000 -0.9983200
O    -6.1712900  7.6350000 -0.9983200
H     1.7632300  0.0000000 -1.8491300
O    -4.4080700  4.5810000  0.9983100
O    -4.4080700 -7.6350000  0.9983100
H    -3.5264500  3.0540000 -1.8491300
O    -4.4080700  1.5270000  0.9983100
O    -4.4080700 -4.5810000  0.9983100
O     4.4080700  4.5810000 -0.9983200
O     4.4080700 -1.5270000 -0.9983200
O     4.4080700 -4.5810000 -0.9983200
O    -8.8161300  6.1080000 -0.9983200
O     3.5264600 -9.1620000  0.9983100
H    -6.1712900  4.5810000 -1.8491300
O     3.5264600  6.1080000  0.9983100
O    -4.4080700  7.6350000  0.9983100
O     3.5264600 -3.0540000  0.9983100
O    -8.8161300  3.0540000 -0.9983200
O    -8.8161300 -6.1080000 -0.9983200
O    -8.8161300 -3.0540000 -0.9983200
O     3.5264600  0.0000000  0.9983100
O    -7.0529100  3.0540000  0.9983100
O     7.0529100  6.1080000 -0.9983200
O    -7.0529100  6.1080000  0.9983100
O     7.0529100 -3.0540000 -0.9983200
O     7.0529100  3.0540000 -0.9983200
O     1.7632300 -3.0540000 -0.9983200
O     6.1713000  4.5810000  0.9983100
O     6.1713000 -4.5810000  0.9983100
O     6.1713000 -7.6350000  0.9983100
H    -0.8816100 -7.6350000 -1.8491300
O     6.1713000 -1.5270000  0.9983100
O    -9.6977500  4.5810000  0.9983100
O    -9.6977500 -4.5810000  0.9983100
O    -7.0529100 -6.1080000  0.9983100
O     8.8161400  6.1080000  0.9983100
O     8.8161400 -6.1080000  0.9983100
O     8.8161400  0.0000000  0.9983100
O     8.8161400 -3.0540000  0.9983100
Al   -2.6448400  1.5270000  0.0000000
O    -1.7632200 -3.0540000  0.9983100
H    -1.7632200  6.1080000  1.8491300
Mg    5.2896900  0.0000000  0.0000000
O     0.8816200 -4.5810000  0.9983100
O     0.8816200  4.5810000  0.9983100
H     1.7632300  3.0540000 -1.8491300
Ni    0.0000000  0.0000000  0.0000000
Al    0.0000000 -3.0540000  0.0000000
O    -4.4080700 -1.5270000  0.9983100
Mg    0.0000000  3.0540000  0.0000000
O     3.5264600 -6.1080000  0.9983100
O     3.5264600  3.0540000  0.9983100
O     3.5264600  9.1620000  0.9983100

```

|    |            |            |            |
|----|------------|------------|------------|
| H  | 4.4080700  | 1.5270000  | -1.8491300 |
| H  | 4.4080700  | 4.5810000  | -1.8491300 |
| H  | 4.4080700  | -4.5810000 | -1.8491300 |
| Mg | 0.0000000  | -9.1620000 | 0.0000000  |
| H  | 7.0529100  | 0.0000000  | -1.8491300 |
| H  | 7.0529100  | -3.0540000 | -1.8491300 |
| H  | 4.4080700  | -1.5270000 | -1.8491300 |
| H  | -0.8816100 | -1.5270000 | -1.8491300 |
| O  | 6.1713000  | 7.6350000  | 0.9983100  |
| O  | -9.6977500 | -1.5270000 | 0.9983100  |
| Al | -2.6448400 | -7.6350000 | 0.0000000  |
| Mg | -2.6448400 | 4.5810000  | 0.0000000  |
| O  | 7.0529100  | -6.1080000 | -0.9983200 |
| Mg | -2.6448400 | -1.5270000 | 0.0000000  |
| H  | 0.8816200  | -4.5810000 | 1.8491300  |
| O  | 8.8161400  | 3.0540000  | 0.9983100  |
| O  | -7.0529100 | 0.0000000  | 0.9983100  |
| H  | -3.5264500 | 0.0000000  | -1.8491300 |
| H  | -3.5264500 | -3.0540000 | -1.8491300 |
| H  | 1.7632300  | -3.0540000 | -1.8491300 |
| Mg | 7.9345300  | 4.5810000  | 0.0000000  |
| H  | 0.8816200  | 7.6350000  | 1.8491300  |
| H  | 0.8816200  | 1.5270000  | 1.8491300  |
| Mg | 2.6448500  | -1.5270000 | 0.0000000  |
| H  | -1.7632200 | -6.1080000 | 1.8491300  |
| Mg | 2.6448500  | -4.5810000 | 0.0000000  |
| Al | 2.6448500  | 1.5270000  | 0.0000000  |
| Mg | 2.6448500  | 7.6350000  | 0.0000000  |
| H  | 7.0529100  | 3.0540000  | -1.8491300 |
| Al | -5.2896800 | 6.1080000  | 0.0000000  |
| Al | -5.2896800 | -3.0540000 | 0.0000000  |
| H  | -0.8816100 | -4.5810000 | -1.8491300 |
| Mg | -5.2896800 | 3.0540000  | 0.0000000  |
| Mg | -5.2896800 | -6.1080000 | 0.0000000  |
| Mg | -5.2896800 | 0.0000000  | 0.0000000  |
| Mg | 5.2896900  | -6.1080000 | 0.0000000  |
| Al | 5.2896900  | -3.0540000 | 0.0000000  |
| Al | -7.9345200 | 1.5270000  | 0.0000000  |
| Mg | -7.9345200 | -4.5810000 | 0.0000000  |
| Mg | -7.9345200 | 4.5810000  | 0.0000000  |
| H  | -3.5264500 | -6.1080000 | -1.8491300 |
| H  | -6.1712900 | 1.5270000  | -1.8491300 |
| Al | 7.9345300  | 1.5270000  | 0.0000000  |
| H  | -6.1712900 | -4.5810000 | -1.8491300 |
| Mg | 7.9345300  | -1.5270000 | 0.0000000  |
| Mg | 7.9345300  | -4.5810000 | 0.0000000  |
| O  | -3.5264500 | 9.1620000  | -0.9983200 |
| O  | 4.4080700  | 1.5270000  | -0.9983200 |
| O  | -3.5264500 | -6.1080000 | -0.9983200 |
| O  | -6.1712900 | -4.5810000 | -0.9983200 |
| O  | -0.8816100 | 4.5810000  | -0.9983200 |
| O  | -0.8816100 | 10.6890000 | -0.9983200 |
| O  | -0.8816100 | -4.5810000 | -0.9983200 |
| O  | 9.6977600  | -1.5270000 | -0.9983200 |
| H  | -4.4080700 | -1.5270000 | 1.8491300  |
| Al | 0.0000000  | 6.1080000  | 0.0000000  |
| Mg | -2.6448400 | -4.5810000 | 0.0000000  |
| H  | 1.7632300  | 6.1080000  | -1.8491300 |
| O  | -9.6977500 | 1.5270000  | 0.9983100  |
| H  | -0.8816100 | 4.5810000  | -1.8491300 |
| Mg | 2.6448500  | 4.5810000  | 0.0000000  |
| Al | 2.6448500  | -7.6350000 | 0.0000000  |
| H  | 6.1713000  | 4.5810000  | 1.8491300  |
| Mg | 5.2896900  | 3.0540000  | 0.0000000  |
| O  | -3.5264500 | -3.0540000 | -0.9983200 |
| O  | -8.8161300 | 0.0000000  | -0.9983200 |
| O  | 4.4080700  | 7.6350000  | -0.9983200 |
| O  | -3.5264500 | 3.0540000  | -0.9983200 |
| O  | 1.7632300  | 3.0540000  | -0.9983200 |
| O  | 1.7632300  | -6.1080000 | -0.9983200 |
| O  | 1.7632300  | 9.1620000  | -0.9983200 |
| O  | -6.1712900 | 1.5270000  | -0.9983200 |
| O  | -6.1712900 | -1.5270000 | -0.9983200 |
| O  | -7.0529100 | -3.0540000 | 0.9983100  |
| H  | -1.7632200 | 3.0540000  | 1.8491300  |
| H  | -1.7632200 | 0.0000000  | 1.8491300  |
| O  | 7.0529100  | 0.0000000  | -0.9983200 |



|    |             |             |            |               |
|----|-------------|-------------|------------|---------------|
| O  | -0.8816100  | -1.5270000  | -0.9983200 |               |
| H  | 1.7632300   | -6.1080000  | -1.8491300 |               |
| Al | 5.2896900   | 6.1080000   | 0.0000000  |               |
| O  | -0.8816100  | -7.6350000  | -0.9983200 |               |
| O  | -0.8816100  | 1.5270000   | -0.9983200 |               |
| H  | -6.1712900  | -1.5270000  | -1.8491300 |               |
| O  | -0.8816100  | 7.6350000   | -0.9983200 |               |
| H  | 0.8816200   | 4.5810000   | 1.8491300  |               |
| H  | 0.8816200   | -7.6350000  | 1.8491300  |               |
| O  | 6.1713000   | 1.5270000   | 0.9983100  |               |
| H  | 0.8816200   | -1.5270000  | 1.8491300  |               |
| O  | -0.8816100  | -10.6890000 | -0.9983200 |               |
| O  | -1.7632200  | 9.1620000   | 0.9983100  |               |
| O  | -1.7632200  | 3.0540000   | 0.9983100  |               |
| O  | -1.7632200  | 6.1080000   | 0.9983100  |               |
| O  | -1.7632200  | 0.0000000   | 0.9983100  |               |
| O  | -1.7632200  | -6.1080000  | 0.9983100  |               |
| O  | 9.6977600   | 1.5270000   | -0.9983200 |               |
| H  | 3.5264600   | 6.1080000   | 1.8491300  |               |
| H  | -4.4080700  | 4.5810000   | 1.8491300  |               |
| H  | -4.4080700  | 1.5270000   | 1.8491300  |               |
| H  | 3.5264600   | 3.0540000   | 1.8491300  |               |
| H  | 3.5264600   | -3.0540000  | 1.8491300  |               |
| H  | 3.5264600   | -6.1080000  | 1.8491300  |               |
| H  | 3.5264600   | 0.0000000   | 1.8491300  |               |
| H  | -7.0529100  | 3.0540000   | 1.8491300  |               |
| H  | -7.0529100  | 0.0000000   | 1.8491300  |               |
| H  | 6.1713000   | -1.5270000  | 1.8491300  |               |
| H  | 6.1713000   | 1.5270000   | 1.8491300  |               |
| H  | 6.1713000   | -4.5810000  | 1.8491300  |               |
| H  | -4.4080700  | -4.5810000  | 1.8491300  |               |
| H  | -7.0529100  | -3.0540000  | 1.8491300  |               |
| O  | -1.7632200  | -9.1620000  | 0.9983100  |               |
| Mg | 0.0000000   | -6.1080000  | 0.0000000  |               |
| O  | 0.8816200   | -1.5270000  | 0.9983100  |               |
| O  | 0.8816200   | 10.6890000  | 0.9983100  |               |
| O  | 9.6977600   | 4.5810000   | -0.9983200 |               |
| O  | 0.8816200   | 1.5270000   | 0.9983100  |               |
| O  | 0.8816200   | -7.6350000  | 0.9983100  |               |
| O  | 0.8816200   | 7.6350000   | 0.9983100  |               |
| H  | -1.7632200  | -3.0540000  | 1.8491300  |               |
| O  | 0.8816200   | -10.6890000 | 0.9983100  |               |
| Mg | -2.6448400  | 7.6350000   | 0.0000000  |               |
| Mg | 0.0000000   | 9.1620000   | 0.0000000  |               |
| H  | -1.7605127  | -10.6890000 | -0.5006957 | z 0.333333333 |
| H  | -0.4421603  | -11.4501525 | -0.5006948 | z 0.333333333 |
| H  | -0.8816100  | -10.6890000 | -2.0083200 |               |
| H  | 3.0870093   | 9.9231543   | 0.5006885  | z 0.333333333 |
| H  | 3.5264600   | 9.1620000   | 2.0083100  |               |
| H  | 4.4053649   | 9.1620000   | 0.5006894  | z 0.333333333 |
| H  | 4.8475237   | -8.3961509  | -0.5006958 | z 0.333333333 |
| H  | 4.4080700   | -7.6350000  | -2.0083200 |               |
| H  | -3.5264500  | -9.1620000  | -2.0083200 |               |
| H  | -4.4053527  | -9.1620000  | -0.5006957 | z 0.333333333 |
| H  | -3.0870003  | -9.9231525  | -0.5006948 | z 0.333333333 |
| H  | -10.1372007 | 2.2881543   | 0.5006885  | z 0.333333333 |
| H  | -9.6977500  | 1.5270000   | 2.0083100  |               |
| H  | -10.1372007 | 0.7658457   | 0.5006885  | z 0.333333333 |
| H  | -4.8475207  | -8.3961543  | 0.5006885  | z 0.333333333 |
| H  | -4.4080700  | -7.6350000  | 2.0083100  |               |
| H  | -9.6950327  | -3.0540000  | -0.5006957 | z 0.333333333 |
| H  | -8.8161300  | -3.0540000  | -2.0083200 |               |
| H  | 9.6977600   | 1.5270000   | -2.0083200 |               |
| H  | 10.1372097  | 2.2881525   | -0.5006948 | z 0.333333333 |
| H  | 10.1372097  | 0.7658475   | -0.5006948 | z 0.333333333 |
| H  | 10.1372097  | -3.8198475  | -0.5006948 | z 0.333333333 |
| H  | 10.1372097  | -5.3421525  | -0.5006948 | z 0.333333333 |
| H  | 9.6977600   | -4.5810000  | -2.0083200 |               |
| H  | 2.2026837   | -9.9231509  | -0.5006958 | z 0.333333333 |
| H  | 1.7632300   | -9.1620000  | -2.0083200 |               |
| H  | -2.2026748  | 9.9231527   | 0.5006896  | z 0.333333333 |
| H  | -1.7632200  | 9.1620000   | 2.0083100  |               |
| H  | -5.7318403  | -8.3961525  | -0.5006948 | z 0.333333333 |
| H  | -7.0501927  | -7.6350000  | -0.5006957 | z 0.333333333 |
| H  | -6.1712900  | -7.6350000  | -2.0083200 |               |
| H  | -6.1712900  | 7.6350000   | -2.0083200 |               |
| H  | -5.7318403  | 8.3961525   | -0.5006948 | z 0.333333333 |

|   |             |             |            |   |             |
|---|-------------|-------------|------------|---|-------------|
| H | -7.0501927  | 7.6350000   | -0.5006957 | z | 0.333333333 |
| H | 7.0502049   | 7.6350000   | 0.5006894  | z | 0.333333333 |
| H | 6.1713000   | 7.6350000   | 2.0083100  |   |             |
| H | 5.7318493   | 8.3961543   | 0.5006885  | z | 0.333333333 |
| H | -10.1372007 | -2.2881543  | 0.5006885  | z | 0.333333333 |
| H | -9.6977500  | -1.5270000  | 2.0083100  |   |             |
| H | -10.1372007 | -0.7658457  | 0.5006885  | z | 0.333333333 |
| H | 7.0529100   | 6.1080000   | -2.0083200 |   |             |
| H | 7.4923637   | 6.8691509   | -0.5006958 | z | 0.333333333 |
| H | 4.4080700   | 7.6350000   | -2.0083200 |   |             |
| H | 4.8475237   | 8.3961509   | -0.5006958 | z | 0.333333333 |
| H | -3.0870003  | 9.9231525   | -0.5006948 | z | 0.333333333 |
| H | -4.4053527  | 9.1620000   | -0.5006957 | z | 0.333333333 |
| H | -3.5264500  | 9.1620000   | -2.0083200 |   |             |
| H | -4.8475207  | 8.3961543   | 0.5006885  | z | 0.333333333 |
| H | -4.4080700  | 7.6350000   | 2.0083100  |   |             |
| H | -9.6950327  | 6.1080000   | -0.5006957 | z | 0.333333333 |
| H | -8.8161300  | 6.1080000   | -2.0083200 |   |             |
| H | -8.3766803  | 6.8691525   | -0.5006948 | z | 0.333333333 |
| H | 3.0870093   | -9.9231543  | 0.5006885  | z | 0.333333333 |
| H | 4.4053649   | -9.1620000  | 0.5006894  | z | 0.333333333 |
| H | 3.5264600   | -9.1620000  | 2.0083100  |   |             |
| H | 10.1372097  | -2.2881525  | -0.5006948 | z | 0.333333333 |
| H | 10.1372097  | -0.7658475  | -0.5006948 | z | 0.333333333 |
| H | 9.6977600   | -1.5270000  | -2.0083200 |   |             |
| H | -9.6950327  | 3.0540000   | -0.5006957 | z | 0.333333333 |
| H | -8.8161300  | 3.0540000   | -2.0083200 |   |             |
| H | -8.8161300  | -6.1080000  | -2.0083200 |   |             |
| H | -9.6950327  | -6.1080000  | -0.5006957 | z | 0.333333333 |
| H | -8.3766803  | -6.8691525  | -0.5006948 | z | 0.333333333 |
| H | 10.1372097  | 5.3421525   | -0.5006948 | z | 0.333333333 |
| H | 10.1372097  | 3.8198475   | -0.5006948 | z | 0.333333333 |
| H | 9.6977600   | 4.5810000   | -2.0083200 |   |             |
| H | -7.0529100  | -6.1080000  | 2.0083100  |   |             |
| H | -7.4923607  | -6.8691543  | 0.5006885  | z | 0.333333333 |
| H | -7.0529100  | 6.1080000   | 2.0083100  |   |             |
| H | -7.4923607  | 6.8691543   | 0.5006885  | z | 0.333333333 |
| H | 7.0529100   | -6.1080000  | -2.0083200 |   |             |
| H | 7.4923637   | -6.8691509  | -0.5006958 | z | 0.333333333 |
| H | -0.8816100  | 10.6890000  | -2.0083200 |   |             |
| H | -0.4421603  | 11.4501525  | -0.5006948 | z | 0.333333333 |
| H | -1.7605127  | 10.6890000  | -0.5006957 | z | 0.333333333 |
| H | -1.7632200  | -9.1620000  | 2.0083100  |   |             |
| H | -2.2026748  | -9.9231527  | 0.5006896  | z | 0.333333333 |
| H | -10.1372007 | 3.8198457   | 0.5006885  | z | 0.333333333 |
| H | -10.1372007 | 5.3421543   | 0.5006885  | z | 0.333333333 |
| H | -9.6977500  | 4.5810000   | 2.0083100  |   |             |
| H | -9.6977500  | -4.5810000  | 2.0083100  |   |             |
| H | -10.1372007 | -5.3421543  | 0.5006885  | z | 0.333333333 |
| H | -10.1372007 | -3.8198457  | 0.5006885  | z | 0.333333333 |
| H | 1.7632300   | 9.1620000   | -2.0083200 |   |             |
| H | 2.2026837   | 9.9231509   | -0.5006958 | z | 0.333333333 |
| H | 0.4421652   | 11.4501527  | 0.5006896  | z | 0.333333333 |
| H | 1.7605249   | 10.6890000  | 0.5006894  | z | 0.333333333 |
| H | 0.8816200   | 10.6890000  | 2.0083100  |   |             |
| H | 9.6950449   | 6.1080000   | 0.5006894  | z | 0.333333333 |
| H | 8.3766893   | 6.8691543   | 0.5006885  | z | 0.333333333 |
| H | 8.8161400   | 6.1080000   | 2.0083100  |   |             |
| H | 9.6950449   | -6.1080000  | 0.5006894  | z | 0.333333333 |
| H | 8.8161400   | -6.1080000  | 2.0083100  |   |             |
| H | 8.3766893   | -6.8691543  | 0.5006885  | z | 0.333333333 |
| H | 8.8161400   | 0.0000000   | 2.0083100  |   |             |
| H | 9.6950449   | 0.0000000   | 0.5006894  | z | 0.333333333 |
| H | 9.6950449   | -3.0540000  | 0.5006894  | z | 0.333333333 |
| H | 8.8161400   | -3.0540000  | 2.0083100  |   |             |
| H | 8.8161400   | 3.0540000   | 2.0083100  |   |             |
| H | 9.6950449   | 3.0540000   | 0.5006894  | z | 0.333333333 |
| H | 1.7605249   | -10.6890000 | 0.5006894  | z | 0.333333333 |
| H | 0.8816200   | -10.6890000 | 2.0083100  |   |             |
| H | 0.4421652   | -11.4501527 | 0.5006896  | z | 0.333333333 |
| H | -8.8161300  | 0.0000000   | -2.0083200 |   |             |
| H | -9.6950327  | 0.0000000   | -0.5006957 | z | 0.333333333 |
| H | 5.7318493   | -8.3961543  | 0.5006885  | z | 0.333333333 |
| H | 6.1713000   | -7.6350000  | 2.0083100  |   |             |
| H | 7.0502049   | -7.6350000  | 0.5006894  | z | 0.333333333 |

**Figure S3.** The calculated electronic spin densities for the (a) small, (b) medium and (c) large cluster models for the single paramagnetic Ni<sup>2+</sup> site in the LDH layer (see Figure S2). Positive and negative equisurfaces (at  $\pm 0.0003$  a.u.) are shown in red and blue, respectively.

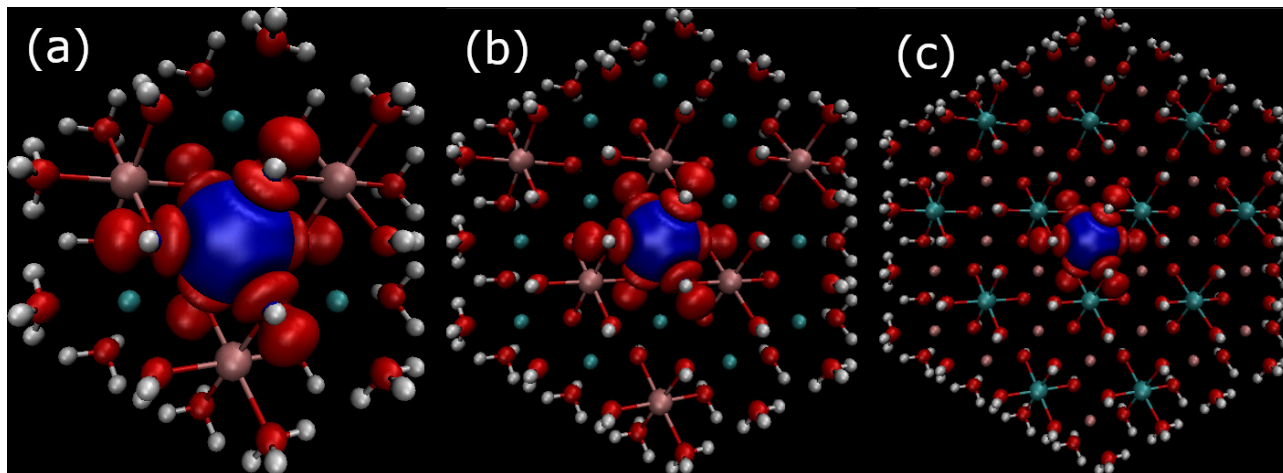

**Table S7.** Atomic positions (Å) of the cluster model used for the calculation of the local hyperfine contributions,  $\sigma_{\text{con}}$ , to the  $^{13}\text{C}$  shielding tensor. In the calculations, only one of the eight Ni positions was occupied by a paramagnetic  $\text{Ni}^{2+}$  atom at a time, whereas the remaining seven positions were diamagnetic  $\text{Mg}^{2+}$ . The entries "z 0.33333" occurring after the coordinates of the pseudohydrogen centres indicate modified nuclear charge.

| Atom | x         | y         | z         | charge     |
|------|-----------|-----------|-----------|------------|
| Ni   | 0.075792  | -6.164210 | 8.435539  |            |
| Ni   | -0.811502 | -4.651290 | 0.950987  |            |
| Ni   | 1.852086  | -6.181589 | 1.020285  |            |
| Ni   | -2.587796 | -4.633911 | 8.366241  |            |
| Ni   | 2.715628  | -4.678594 | 8.468352  |            |
| Ni   | 0.088917  | -9.187500 | 8.386310  |            |
| Ni   | -3.452039 | -6.177163 | 0.948090  |            |
| Ni   | -0.808611 | -1.612690 | 0.998895  |            |
| H    | -2.547331 | -4.620428 | -1.059361 |            |
| H    | -2.481067 | -1.553484 | -1.046386 |            |
| H    | -2.437799 | -7.762943 | -1.031962 |            |
| H    | -5.281909 | -6.408986 | -1.019302 |            |
| H    | 2.865938  | -7.520242 | -1.012824 |            |
| H    | 0.070805  | -6.293850 | -1.008144 |            |
| H    | 0.062957  | -0.016096 | -1.007907 |            |
| H    | 0.040797  | -9.122474 | -0.997548 |            |
| H    | 0.208343  | -3.046247 | -0.991896 |            |
| H    | 2.603717  | -4.559161 | -0.971861 |            |
| H    | 2.765674  | -1.752441 | -0.970232 |            |
| O    | -5.101841 | -3.108889 | -0.081988 |            |
| O    | -2.631533 | -4.549932 | -0.076265 |            |
| O    | -2.631487 | -1.682249 | -0.055985 |            |
| O    | 0.031818  | -6.277360 | -0.024556 |            |
| O    | -2.426613 | -7.707830 | -0.023529 |            |
| O    | -5.298606 | -6.263040 | -0.020042 |            |
| O    | 2.859434  | -7.691893 | -0.017538 |            |
| O    | 0.203607  | -3.126146 | -0.007782 |            |
| O    | 0.000000  | 0.000000  | 0.000000  |            |
| O    | 0.015261  | -9.109732 | 0.012049  |            |
| O    | 2.682336  | -4.548951 | 0.035023  |            |
| O    | 2.680609  | -1.726591 | 0.035848  |            |
| H    | -3.032844 | -0.901683 | 0.443745  | z 0.333333 |
| H    | -5.584756 | -2.399271 | 0.450305  | z 0.333333 |
| H    | -5.584756 | -3.818507 | 0.450305  | z 0.333333 |
| H    | -2.924172 | -8.437792 | 0.466054  | z 0.333333 |
| H    | 2.372624  | -8.432709 | 0.466515  | z 0.333333 |
| H    | 0.911004  | -9.155802 | 0.476399  | z 0.333333 |
| H    | -5.690240 | -5.487395 | 0.494834  | z 0.333333 |
| H    | -0.374671 | -9.900640 | 0.504511  | z 0.333333 |
| H    | 2.263405  | -0.935291 | 0.504767  | z 0.333333 |
| H    | 3.722144  | -7.706480 | 0.507456  | z 0.333333 |
| H    | -5.719627 | -7.014064 | 0.507978  | z 0.333333 |
| H    | -0.432393 | 0.747999  | 0.523101  | z 0.333333 |
| H    | 0.432393  | 0.747999  | 0.523101  | z 0.333333 |
| H    | 3.560391  | -4.620290 | 0.529018  | z 0.333333 |
| H    | 3.558714  | -1.686211 | 0.533241  | z 0.333333 |
| Al   | -3.447112 | -3.147285 | 0.923277  |            |
| Al   | -0.800033 | -7.675038 | 0.980140  |            |
| Al   | 1.830932  | -3.139355 | 1.016980  |            |
| H    | -5.307603 | -7.685448 | 1.449660  | z 0.333333 |
| H    | -1.218780 | 0.751846  | 1.462447  | z 0.333333 |
| H    | -3.884307 | -0.917074 | 1.475498  | z 0.333333 |
| H    | 4.110449  | -7.050716 | 1.480642  | z 0.333333 |
| H    | -3.955565 | -8.431122 | 1.486201  | z 0.333333 |
| H    | -2.541584 | -0.027414 | 1.492380  | z 0.333333 |
| H    | 1.333690  | -8.425871 | 1.498254  | z 0.333333 |
| H    | -5.185800 | -1.665611 | 1.499839  | z 0.333333 |
| H    | -5.173197 | -4.600243 | 1.507373  | z 0.333333 |
| H    | 1.403810  | -0.932084 | 1.519057  | z 0.333333 |

|    |           |            |          |            |
|----|-----------|------------|----------|------------|
| H  | -2.492481 | -9.153255  | 1.523568 | z 0.333333 |
| H  | -1.217862 | -9.901136  | 1.543855 | z 0.333333 |
| H  | 4.076368  | -5.522192  | 1.547337 | z 0.333333 |
| H  | 3.966127  | -2.423110  | 1.567860 | z 0.333333 |
| H  | 3.969400  | -3.902727  | 1.572171 | z 0.333333 |
| O  | -4.278211 | -1.723235  | 1.939227 |            |
| O  | -1.836032 | -3.134195  | 1.948102 |            |
| O  | -4.268915 | -4.544465  | 1.953761 |            |
| O  | -1.636231 | -6.272952  | 1.963538 |            |
| O  | -4.441768 | -7.689528  | 1.969672 |            |
| O  | -1.657696 | 0.003852   | 1.980093 |            |
| O  | 0.836812  | -7.697637  | 1.991091 |            |
| O  | 1.001660  | -4.554737  | 1.997271 |            |
| O  | 1.007467  | -1.720681  | 2.010104 |            |
| O  | -1.615212 | -9.104991  | 2.021733 |            |
| O  | 3.676117  | -6.317984  | 2.023376 |            |
| O  | 3.481853  | -3.162576  | 2.056500 |            |
| H  | -4.139733 | -1.607626  | 2.932986 |            |
| H  | -1.838660 | -3.068973  | 2.933391 |            |
| H  | -1.608827 | -6.262638  | 2.949511 |            |
| H  | 0.932031  | -4.537195  | 2.976863 |            |
| H  | -4.435111 | -7.722651  | 2.979107 |            |
| H  | -1.576841 | -0.013914  | 2.986695 |            |
| H  | 0.825162  | -7.540356  | 2.988701 |            |
| H  | 1.077223  | -1.720920  | 3.017692 |            |
| H  | 3.669274  | -6.451752  | 3.024455 |            |
| H  | -1.635174 | -9.027981  | 3.028595 |            |
| H  | 3.463951  | -3.354261  | 3.047982 |            |
| O  | -1.288443 | -6.029390  | 4.672293 |            |
| O  | 0.770226  | -6.944929  | 4.691196 |            |
| C  | -0.006173 | -5.927192  | 4.698588 |            |
| O  | 0.541118  | -4.710593  | 4.726237 |            |
| H  | 1.073425  | -10.680886 | 6.357385 |            |
| H  | -4.214092 | -7.745564  | 6.383292 |            |
| H  | 3.542747  | -6.429614  | 6.403639 |            |
| H  | -1.705489 | -6.276471  | 6.407110 |            |
| H  | -1.735497 | -9.105095  | 6.417706 |            |
| H  | 1.089465  | -7.507591  | 6.429842 |            |
| H  | 0.989380  | -1.735062  | 6.445022 |            |
| H  | 0.829478  | -4.541516  | 6.469717 |            |
| O  | -4.407827 | -4.532553  | 7.338989 |            |
| O  | 3.722815  | -3.129517  | 7.340954 |            |
| O  | 0.923005  | -10.809651 | 7.347785 |            |
| O  | -1.744476 | -6.259981  | 7.390698 |            |
| O  | -4.202906 | -7.690451  | 7.391726 |            |
| O  | 1.083140  | -7.674514  | 7.397716 |            |
| O  | 3.526050  | -6.283669  | 7.402899 |            |
| O  | 3.554492  | -9.127402  | 7.403770 |            |
| O  | -1.572686 | -3.108767  | 7.407472 |            |
| O  | -1.761033 | -9.092353  | 7.427303 |            |
| O  | 0.906042  | -4.531573  | 7.450277 |            |
| O  | 0.904315  | -1.709212  | 7.451102 |            |
| H  | -4.804234 | -5.318710  | 7.833881 | z 0.333333 |
| H  | 1.796707  | -10.776312 | 7.853388 | z 0.333333 |
| H  | 0.498766  | -11.571675 | 7.857139 | z 0.333333 |
| H  | -4.700136 | -6.948231  | 7.862864 | z 0.333333 |
| H  | 4.585840  | -3.149542  | 7.865250 | z 0.333333 |
| H  | -4.840076 | -3.789164  | 7.868737 | z 0.333333 |
| H  | 4.419807  | -6.242103  | 7.871485 | z 0.333333 |
| H  | 3.239901  | -2.419899  | 7.873247 | z 0.333333 |
| H  | -4.700465 | -8.420413  | 7.881308 | z 0.333333 |
| H  | 4.438887  | -9.175458  | 7.889195 | z 0.333333 |
| H  | 3.158448  | -9.917271  | 7.893012 | z 0.333333 |
| H  | -2.064075 | -2.374049  | 7.896171 | z 0.333333 |
| H  | -2.150964 | -9.883261  | 7.919765 | z 0.333333 |
| H  | 0.487111  | -0.917912  | 7.920021 | z 0.333333 |
| H  | 1.782420  | -1.668832  | 7.948496 | z 0.333333 |
| Al | -2.576327 | -7.657659  | 8.395395 |            |
| Al | 2.730730  | -7.702371  | 8.400343 |            |
| Al | 0.054639  | -3.121976  | 8.432234 |            |
| H  | -0.290295 | -11.593288 | 8.813173 | z 0.333333 |
| H  | -1.157142 | -11.593288 | 8.813173 | z 0.333333 |
| H  | -4.464502 | -3.123740  | 8.821278 | z 0.333333 |
| H  | 4.987870  | -3.830414  | 8.834843 | z 0.333333 |
| H  | -4.293114 | -6.209120  | 8.886344 | z 0.333333 |
| H  | 4.951577  | -5.356253  | 8.889382 | z 0.333333 |
| H  | -3.110242 | -2.373282  | 8.899494 | z 0.333333 |

|   |           |            |           |            |
|---|-----------|------------|-----------|------------|
| H | 2.310505  | -9.911195  | 8.905784  | z 0.333333 |
| H | 4.869092  | -8.451750  | 8.909142  | z 0.333333 |
| H | 4.869092  | -6.968562  | 8.909142  | z 0.333333 |
| H | -0.372484 | -0.914705  | 8.934311  | z 0.333333 |
| H | -1.650068 | -1.650901  | 8.934675  | z 0.333333 |
| H | -4.268775 | -9.135876  | 8.938822  | z 0.333333 |
| H | -2.994156 | -9.883757  | 8.959109  | z 0.333333 |
| H | 2.189833  | -2.405731  | 8.983114  | z 0.333333 |
| O | -0.723718 | -10.850637 | 9.342997  |            |
| O | -3.612326 | -3.116816  | 9.363356  |            |
| O | 4.555741  | -4.565093  | 9.376702  |            |
| O | -3.412525 | -6.255573  | 9.378792  |            |
| O | 1.896796  | -9.123550  | 9.383863  |            |
| O | 4.382888  | -7.710156  | 9.392613  |            |
| O | -0.939482 | -7.680258  | 9.406345  |            |
| O | -0.774633 | -4.537358  | 9.412525  |            |
| O | -0.768827 | -1.703303  | 9.425358  |            |
| O | -3.391505 | -9.087612  | 9.436987  |            |
| O | 1.899823  | -6.300606  | 9.438630  |            |
| O | 1.705559  | -3.145197  | 9.471754  |            |
| H | -0.585241 | -10.735028 | 10.336757 |            |
| H | -3.615013 | -3.050105  | 10.371147 |            |
| H | -0.950820 | -7.527186  | 10.377257 |            |
| H | 4.659333  | -4.647291  | 10.378007 |            |
| H | -3.384465 | -6.245013  | 10.388347 |            |
| H | 1.977651  | -9.141316  | 10.390465 |            |
| H | 4.389545  | -7.743279  | 10.402048 |            |
| H | -0.844263 | -4.519817  | 10.392117 |            |
| H | -0.699071 | -1.703541  | 10.432946 |            |
| H | 1.893148  | -6.431108  | 10.415275 |            |
| H | -3.411467 | -9.010603  | 10.443849 |            |
| H | 1.687657  | -3.336882  | 10.463237 |            |
| H | -1.572686 | -3.108767  | 6.397472  |            |
| H | -4.268915 | -4.544465  | 2.963761  |            |
| H | 3.554492  | -9.127402  | 6.393770  |            |
| H | 3.722815  | -3.129517  | 6.330953  |            |
| H | -4.407827 | -4.532553  | 6.328989  |            |
| H | -5.101841 | -3.108889  | -1.091988 |            |

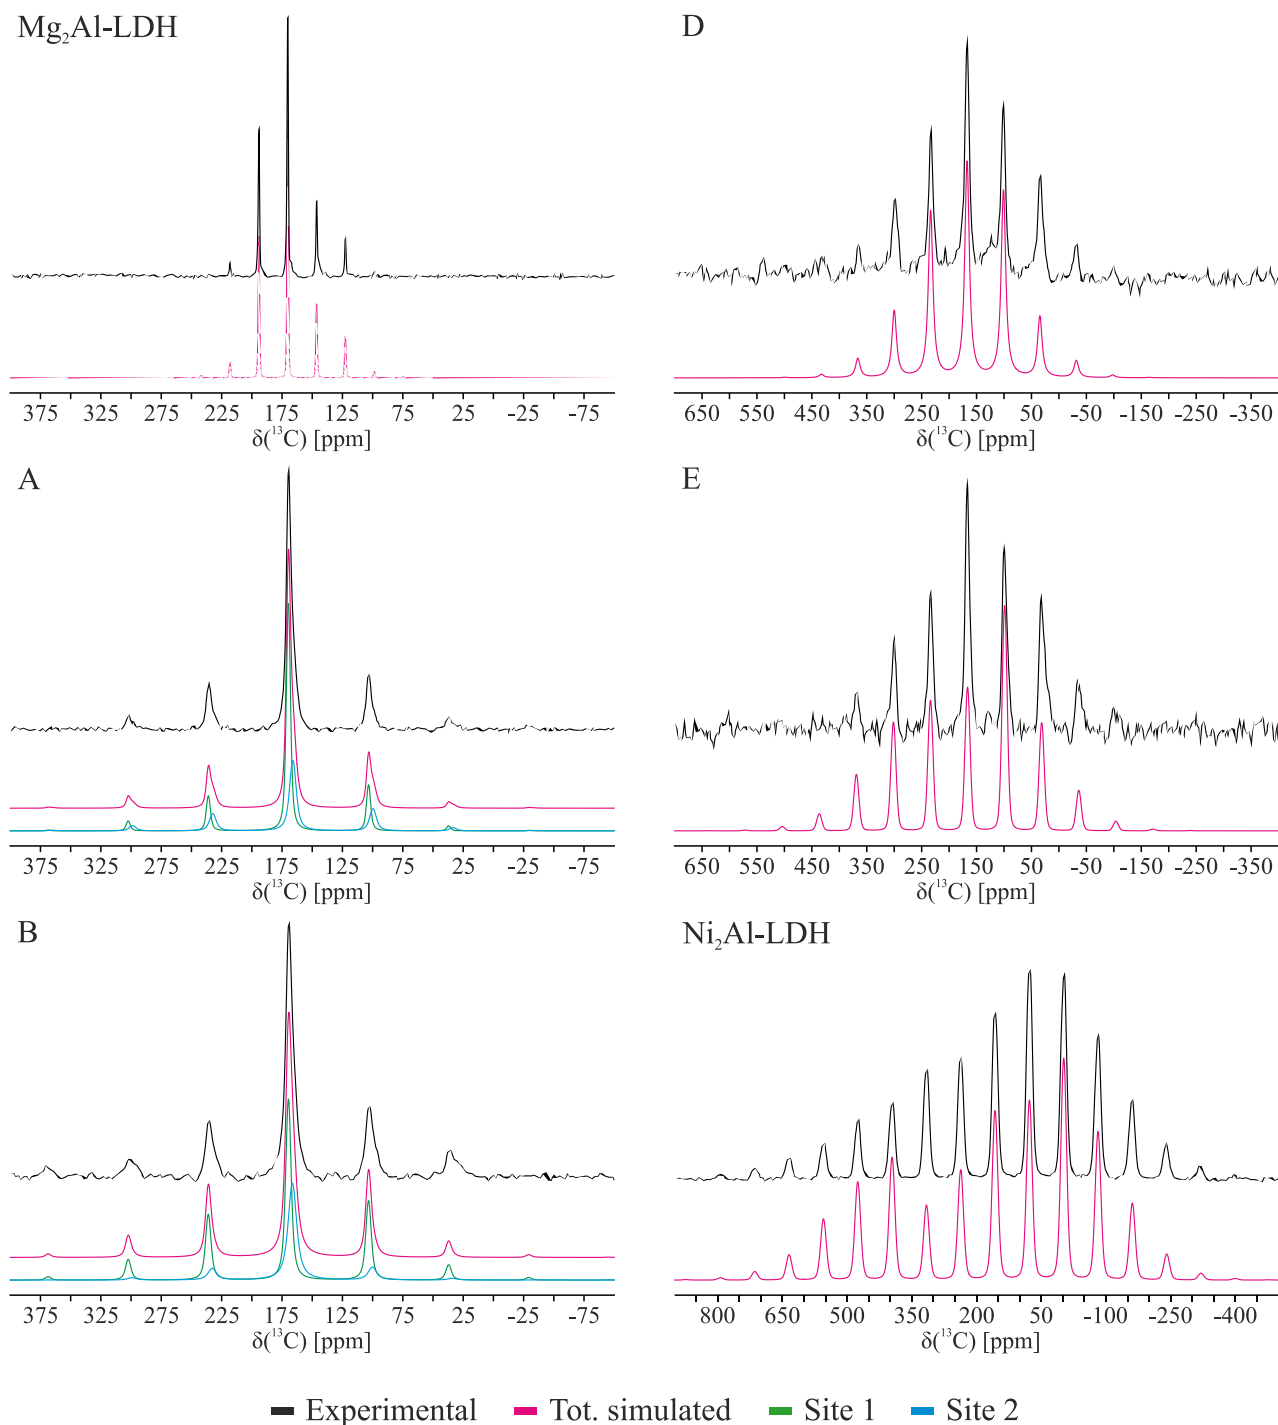

**Figure S4.** Experimental and simulated  $^{13}\text{C}$  MAS NMR spectra of the  $\text{Mg}_{2-x}\text{Ni}_x\text{Al-LDH}$  samples with  $x = 0$  (Mg), 0.16 (A), 0.34 (B), 0.68 (D), 0.84 (E), and 2 (Ni), the parameters given in Table 2 were used for the simulations. Notice that different scales (ppm) are used in the left and right columns. For A and B, a second site that accounts for 35% of the total intensity, was needed.

**Table S8.**  $^{13}\text{C}$  MAS NMR parameters reported in the Haerberlen convention.<sup>a</sup>

| Sample                             | $\delta_{\text{iso}}(^{13}\text{C})$ (ppm) | $\Delta$ (ppm) | $\eta$   |
|------------------------------------|--------------------------------------------|----------------|----------|
| $\text{Na}_2\text{CO}_3(\text{s})$ | 170.4(3)                                   | -51(1)         | 0.30(5)  |
| $\text{NaHCO}_3(\text{s})$         | 164.3(4)                                   | 62(2)          | 0.40(10) |
| $\text{Mg}_2\text{Al-LDH}$         | 170.3(3)                                   | -53(3)         | 0.25(10) |
| $A^b$                              | 169.7                                      | 97             | 0.56     |
|                                    | 166.0                                      | 116            | 0.67     |
| $B^b$                              | 169.2                                      | 114            | 0.57     |
|                                    | 166.2                                      | 116            | 0.67     |
| D                                  | 167.3                                      | 174            | 0.91     |
| E                                  | 166.4                                      | 250            | 0.70     |
| $\text{Ni}_2\text{Al-LDH}$         | 157.1                                      | 480            | 0.56     |

<sup>a</sup>The Haerberlen convention entails for the isotropic value  $\delta_{\text{iso}} = \frac{1}{3}(\delta_{xx} + \delta_{yy} + \delta_{zz})$ , with the principal values arranged adhering to  $|\delta_{zz} - \delta_{\text{iso}}| \geq |\delta_{xx} - \delta_{\text{iso}}| \geq |\delta_{yy} - \delta_{\text{iso}}|$ , the reduced anisotropy  $\Delta = \delta_{zz} - \delta_{\text{iso}}$ , and the asymmetry parameter  $\eta = (\delta_{yy} - \delta_{xx})/\Delta$ , where  $0 \leq \eta \leq 1$ . <sup>b</sup>The site at 169 ppm has approximately twice the intensity of the 166 ppm site.



**Table S9.** Calculated orbital shielding tensors, eigenvalues and the corresponding eigenvectors, as well as isotropic shielding constants ( $\sigma$ ), shielding anisotropy ( $\Delta\sigma$ ), and asymmetry parameter  $\eta$ , for local environments of the interlayer  $\text{CO}_3^{2-}$  in the optimised unit cells of the  $\text{Mg}_2\text{Al-LDH}$  material. The LDH layer normal is in the  $z$  coordinate direction.

| Site  | Shielding tensor (ppm) |        |       | Eigenvalues (ppm) | Eigenvectors |       |       | $\sigma$ (ppm) | $\Delta\sigma$ (ppm) <sup>a</sup> | $\eta$ <sup>b</sup> |
|-------|------------------------|--------|-------|-------------------|--------------|-------|-------|----------------|-----------------------------------|---------------------|
|       |                        |        |       |                   | $x$          | $y$   | $z$   |                |                                   |                     |
| 1M/C1 | -19.01                 | -6.41  | 0.23  | 48.26             | 0.01         | -0.02 | 1.00  | -1.98          | 75.36                             | 0.47                |
|       | -9.97                  | -35.17 | -1.62 | -15.73            | -0.89        | 0.46  | 0.02  |                |                                   |                     |
|       | 0.57                   | -1.04  | 48.23 | -38.46            | -0.31        | -0.95 | -0.01 |                |                                   |                     |
| 1M/C2 | -4.95                  | -14.42 | -1.11 | 46.54             | -0.02        | -0.01 | 1.00  | 1.96           | 66.86                             | 1.02                |
|       | -22.52                 | -35.65 | -1.57 | 3.37              | -0.87        | 0.50  | -0.01 |                |                                   |                     |
|       | -1.84                  | -1.91  | 46.48 | -44.02            | -0.35        | -0.94 | -0.03 |                |                                   |                     |
| 2T/C1 | -33.07                 | -6.04  | 0.00  | 50.83             | 0.00         | 0.00  | 1.00  | -2.63          | 80.20                             | 0.32                |
|       | -8.59                  | -25.65 | -0.01 | -21.26            | 0.46         | -0.89 | 0.00  |                |                                   |                     |
|       | 0.00                   | -0.01  | 50.83 | -37.47            | 0.81         | 0.59  | 0.00  |                |                                   |                     |
| 2T/C2 | -9.68                  | 7.06   | -0.02 | 50.22             | 0.00         | 0.00  | 1.00  | 0.12           | 75.15                             | 0.65                |
|       | 5.20                   | -40.18 | 0.01  | -8.52             | -0.99        | -0.16 | 0.00  |                |                                   |                     |
|       | -0.02                  | 0.01   | 50.22 | -41.34            | -0.22        | 0.98  | 0.00  |                |                                   |                     |
| 2T/C3 | -33.74                 | 11.79  | -0.01 | 51.35             | 0.00         | 0.00  | 1.00  | -1.91          | 79.89                             | 0.26                |
|       | 1.42                   | -23.33 | 0.00  | -21.91            | -0.71        | -0.71 | 0.00  |                |                                   |                     |
|       | -0.01                  | 0.00   | 51.35 | -35.15            | 0.99         | -0.12 | 0.00  |                |                                   |                     |
| 2T/C4 | -38.97                 | -0.89  | -0.03 | 49.88             | 0.00         | 0.00  | 1.00  | -2.04          | 77.89                             | 0.44                |
|       | 1.58                   | -17.04 | 0.00  | -17.10            | -0.04        | 1.00  | 0.00  |                |                                   |                     |
|       | -0.03                  | 0.00   | 49.88 | -38.91            | -1.00        | 0.07  | 0.00  |                |                                   |                     |

<sup>a</sup> Defined from the shielding eigenvalues as  $\Delta\sigma = \sigma_{33} - (\sigma_{11} + \sigma_{22})/2$ , where  $\sigma_{33}$  is in the present case the most shielded eigenvalue in the direction of the LDH layer normal. The eigenvalues  $\sigma_{11}$  and  $\sigma_{22}$  are located in the plane parallel to the LDH layers. <sup>b</sup> Defined from the shielding eigenvalues as  $\eta = \frac{\sigma_{22} - \sigma_{11}}{\sigma_{33}}$ .

**Table S10.** Calculated hyperfine contributions to the paramagnetic  $^{13}\text{C}$  NMR shielding tensor  $\sigma$  (in ppm) from the different  $\text{Ni}^{2+}$  sites using the cluster model depicted in Figure 4.

| $\text{Ni}^{2+}$ site number | $\sigma_{\text{hf}}$ |       |        | $\sigma_{\text{pc}}^{(1)}$ |       |        | $\sigma_{\text{con}}$ |        |       |
|------------------------------|----------------------|-------|--------|----------------------------|-------|--------|-----------------------|--------|-------|
| 1                            | 129.6                | -0.5  | -7.6   | 126.6                      | 0.5   | -8.2   | 3.1                   | -1.0   | 0.7   |
|                              | -0.4                 | 129.2 | 21.4   | 0.5                        | 125.2 | 23.8   | -1.0                  | 3.9    | -2.4  |
|                              | -8.1                 | 21.9  | -207.5 | -8.7                       | 25.1  | -262.1 | 0.6                   | -3.2   | 54.6  |
| 2                            | 89.2                 | 13.7  | -51.1  | 89.0                       | 19.1  | -55.7  | 0.3                   | -5.4   | 4.5   |
|                              | 13.8                 | 76.1  | 81.0   | 19.1                       | 70.8  | 88.2   | -5.3                  | 5.3    | -7.2  |
|                              | -52.8                | -52.8 | -138.2 | -58.7                      | 93.0  | -166.2 | 5.9                   | -145.8 | 28.1  |
| 3                            | 44.0                 | 6.8   | 104.4  | 37.1                       | 7.9   | 113.0  | 6.9                   | -1.1   | -8.7  |
|                              | 6.7                  | 89.4  | -15.5  | 7.9                        | 93.5  | -15.5  | -1.2                  | -4.2   | -0.1  |
|                              | 107.6                | -15.8 | -113.1 | 119.2                      | -16.3 | -136.0 | -11.6                 | 0.5    | 22.9  |
| 4                            | 9.1                  | 26.3  | 81.2   | 5.4                        | 30.1  | 84.8   | 3.7                   | -3.8   | -3.6  |
|                              | 26.6                 | 51.2  | -38.5  | 30.1                       | 50.4  | -42.5  | -3.5                  | 0.8    | 4.0   |
|                              | 83.5                 | -39.3 | -51.1  | 89.4                       | -44.8 | -58.1  | -5.9                  | 5.5    | 6.9   |
| 5                            | 9.1                  | -25.1 | -74.5  | 2.5                        | -26.2 | -78.7  | 6.7                   | 1.2    | 4.2   |
|                              | -24.9                | 48.3  | -36.1  | -26.2                      | 47.6  | -36.1  | 1.3                   | 0.6    | 0.0   |
|                              | -76.3                | -37.2 | -45.8  | -83.0                      | -38.1 | -52.1  | 6.7                   | 0.9    | 6.3   |
| 6                            | 55.5                 | 3.3   | -3.2   | 55.7                       | 2.1   | -2.4   | -0.2                  | 1.2    | -0.8  |
|                              | 3.6                  | -11.8 | 78.1   | 2.1                        | -17.6 | 82.5   | 1.4                   | 5.8    | -4.4  |
|                              | -3.5                 | 80.2  | -34.4  | -2.5                       | 87.0  | -39.7  | -0.9                  | -6.8   | 5.3   |
| 7                            | -15.1                | -5.3  | -73.4  | -18.6                      | -5.0  | -74.4  | 3.4                   | -0.3   | 0.9   |
|                              | -5.3                 | 50.4  | -6.5   | -5.0                       | 49.9  | -5.4   | -0.3                  | 0.5    | -1.1  |
|                              | -75.2                | -6.7  | -34.4  | -78.4                      | -5.7  | -32.6  | 3.2                   | -1.0   | -1.8  |
| 8                            | 31.1                 | 10.5  | -9.3   | 33.1                       | 11.1  | -9.5   | -2.1                  | -0.6   | 0.2   |
|                              | 10.7                 | -22.2 | 48.5   | 11.1                       | -24.5 | 50.8   | -0.4                  | 2.3    | -2.3  |
|                              | -9.7                 | 49.9  | -7.9   | -10.0                      | 53.6  | -9.0   | 0.3                   | -3.7   | 1.2   |
| Sum of 1...8                 | 352.6                | 29.7  | -33.6  | 330.8                      | 39.6  | -31.0  | 21.8                  | -9.9   | -2.6  |
|                              | 30.5                 | 410.5 | 132.4  | 39.6                       | 395.3 | 145.9  | -9.0                  | 15.2   | -13.5 |
|                              | -34.5                | 0.2   | -632.4 | -32.7                      | 153.8 | -755.7 | -1.8                  | -153.7 | 123.4 |

## Anisotropic shift results from individual carbon sites using method 2

Method 2 described below is a variation of method 1: The shielding tensors are first diagonalised to obtain the eigenvalues, which are subsequently averaged over the different impurity distributions. In contrast to method 1, the results are reported individually for the various carbon sites (1M/C1-2 and 2T/C1-4), in method 2. Figure S5 and Table S11 present the obtained average eigenvalue data. A linear relation is observed between the eigenvalues of the shift tensor and  $x$  ( $\text{Ni}^{2+}$  content). Across the different sites and stacking models (1M or 2T) for both the X-ray and optimised geometries, each of the computed eigenvalues show significant variation for a fixed  $\text{Ni}^{2+}$  content,  $x$ . For example, this range is close to 250 ppm for the top eigenvalue  $\delta_{11}$  (in the perpendicular direction with respect to the LDH layers) for the Ni end member ( $x = 1$ ) and close to 150 ppm for the two in-plane eigenvalues ( $\delta_{22}$  and  $\delta_{33}$ ). For the eigenvalue  $\delta_{11}$ , which is in the direction of the layer normal, the differences among the individual carbon sites (C1 and C2 for 1M, C1-4 for 2T) is reduced when the geometry-optimised 1M and 2T structures are used instead of their X-ray counterparts. Some of the sites, such as that of the 2T/C3 site, change very dramatically upon relaxing the geometry, although the average over the different sites, in method 1 above, only changes a bit. Most likely the geometry optimisation is a necessary step in the present kind of modelling of the interlayer space, due to the poorly defined hydrogen positions of the X-ray structures and highly disordered interlayer, as also noted in the reported X-ray structures.<sup>7,8</sup>

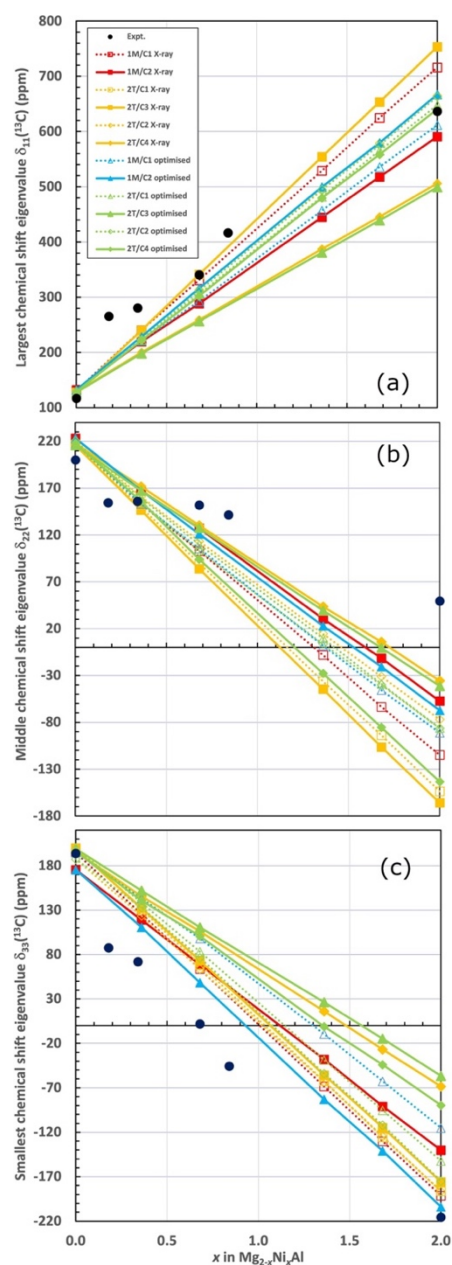

**Figure S5.** The experimental and computed total  $^{13}\text{C}$  chemical shift tensor eigenvalues ( $\delta_{11}$ ,  $\delta_{22}$ , and  $\delta_{33}$ , in ppm) for  $\text{CO}_3^{2-}$  in  $\text{Mg}_{2-x}\text{Ni}_x\text{Al-LDH}$  as functions of  $x$ . The sum of the orbital, pseudocontact and local hyperfine contributions obtained from method 2 described in the preceding chapter of this ESI document: total shielding tensors diagonalised individually for the different carbon sites of the 1M (sites C1 and C2) and 2T (sites C1-C4) models and the obtained eigenvalues then averaged over the  $\text{Ni}^{2+}$  distributions. The results are shown separately for the experimental X-ray and computationally optimised structures. (a) Largest, (b) middle, and (c) lowest eigenvalue, which correspond to  $\delta_{11}$ ,  $\delta_{22}$  and  $\delta_{33}$ , respectively.

**Table S11.** Calculated  $^{13}\text{C}$  NMR chemical shift data (ppm),  $\delta(^{13}\text{C})$ , for  $\text{CO}_3^{2-}$  in  $\text{Mg}_{2-x}\text{Ni}_x\text{Al-LDH}$  as a function of  $x$ . The data includes the contributions from the orbital, pseudocontact and local hyperfine interactions and the calculations have been carried out using method 2 described in the text.

| Structure       | Eigenvalue    | $x = 0$ | $x = 0.36$ | $x = 0.68$ | $x = 1.36$ | $x = 1.68$ | $x = 2$ |
|-----------------|---------------|---------|------------|------------|------------|------------|---------|
| 1M/C1 X-ray     | $\delta_{11}$ | 131     | 240        | 331        | 529        | 625        | 716     |
|                 | $\delta_{22}$ | 218     | 153        | 103        | -8         | -64        | -115    |
|                 | $\delta_{33}$ | 195     | 125        | 64         | -69        | -130       | -191    |
| 1M/C2 X-ray     | $\delta_{11}$ | 132     | 219        | 288        | 445        | 517        | 591     |
|                 | $\delta_{22}$ | 223     | 168        | 127        | 30         | -12        | -57     |
|                 | $\delta_{33}$ | 175     | 119        | 69         | -38        | -91        | -140    |
| 2T/C1 X-ray     | $\delta_{11}$ | 128     | 240        | 342        | 554        | 654        | 754     |
|                 | $\delta_{22}$ | 217     | 150        | 90         | -36        | -94        | -154    |
|                 | $\delta_{33}$ | 200     | 131        | 69         | -63        | -126       | -186    |
| 2T/C3 X-ray     | $\delta_{11}$ | 128     | 240        | 341        | 554        | 653        | 753     |
|                 | $\delta_{22}$ | 216     | 147        | 84         | -45        | -106       | -166    |
|                 | $\delta_{33}$ | 199     | 132        | 73         | -56        | -115       | -176    |
| 2T/C2 X-ray     | $\delta_{11}$ | 129     | 228        | 314        | 493        | 579        | 665     |
|                 | $\delta_{22}$ | 220     | 161        | 113        | 15         | -31        | -77     |
|                 | $\delta_{33}$ | 187     | 123        | 64         | -63        | -125       | -186    |
| 2T/C4 X-ray     | $\delta_{11}$ | 129     | 200        | 259        | 387        | 445        | 506     |
|                 | $\delta_{22}$ | 218     | 172        | 130        | 44         | 6          | -36     |
|                 | $\delta_{33}$ | 196     | 146        | 106        | 16         | -27        | -68     |
| 1M/C1 optimised | $\delta_{11}$ | 131     | 221        | 292        | 457        | 536        | 612     |
|                 | $\delta_{22}$ | 218     | 153        | 106        | 2          | -46        | -91     |
|                 | $\delta_{33}$ | 195     | 143        | 98         | -9         | -63        | -115    |
| 1M/C2 optimised | $\delta_{11}$ | 132     | 228        | 316        | 499        | 579        | 667     |
|                 | $\delta_{22}$ | 223     | 168        | 121        | 23         | -21        | -67     |
|                 | $\delta_{33}$ | 175     | 111        | 48         | -83        | -141       | -204    |
| 2T/C1 optimised | $\delta_{11}$ | 128     | 222        | 306        | 482        | 565        | 648     |
|                 | $\delta_{22}$ | 217     | 160        | 110        | 10         | -39        | -86     |
|                 | $\delta_{33}$ | 200     | 138        | 83         | -39        | -95        | -152    |
| 2T/C3 optimised | $\delta_{11}$ | 128     | 198        | 256        | 381        | 439        | 499     |
|                 | $\delta_{22}$ | 216     | 167        | 127        | 39         | -1         | -41     |
|                 | $\delta_{33}$ | 199     | 152        | 111        | 26         | -15        | -57     |
| 2T/C2 optimised | $\delta_{11}$ | 129     | 224        | 312        | 495        | 575        | 663     |
|                 | $\delta_{22}$ | 220     | 156        | 103        | 4          | -40        | -86     |
|                 | $\delta_{33}$ | 187     | 133        | 76         | -54        | -112       | -175    |
| 2T/C4 optimised | $\delta_{11}$ | 129     | 222        | 302        | 479        | 558        | 640     |
|                 | $\delta_{22}$ | 218     | 156        | 94         | -28        | -85        | -143    |
|                 | $\delta_{33}$ | 196     | 141        | 101        | -1         | -44        | -90     |

### **Anisotropic shift results from diagonalised average tensors (method 3)**

In method 3, the full  $^{13}\text{C}$  shift tensors are averaged over the various impurity distributions before diagonalisation of the average tensors, at each value of  $x$ . Figure S6 shows such eigenvalues averaged over the two (for the 1M structure) and four (2T) carbon sites. The corresponding numerical data are presented in Table S12. The general findings are similar to those obtained from method 1 in the main text: there is a linear dependence of the shift eigenvalues on  $x$ . The largest (perpendicular to the LDH planes) eigenvalue,  $\delta_{11}$ , is reproduced in a very good agreement with the experiment, when the local hyperfine correction  $\delta_{\text{con}}$  is taken into account. Also, the furthest in-plane eigenvalue,  $\delta_{33}$ , agrees in an overall satisfactory way with the SSNMR data. Finally,  $\delta_{22}$  remains relative poorly reproduced by the computations. No large qualitative difference between the X-ray and optimised structures can be found. In the light of the findings of method 2, this follows from averaging over the sites. A distinct feature of method 3 as compared to both methods 1 and 2 is that averaging the tensors before diagonalisation tends to render the asymmetry, *i.e.*, difference between the in-plane eigenvalues  $\delta_{22}$  and  $\delta_{33}$ , small. Experimentally the two are clearly distinct.

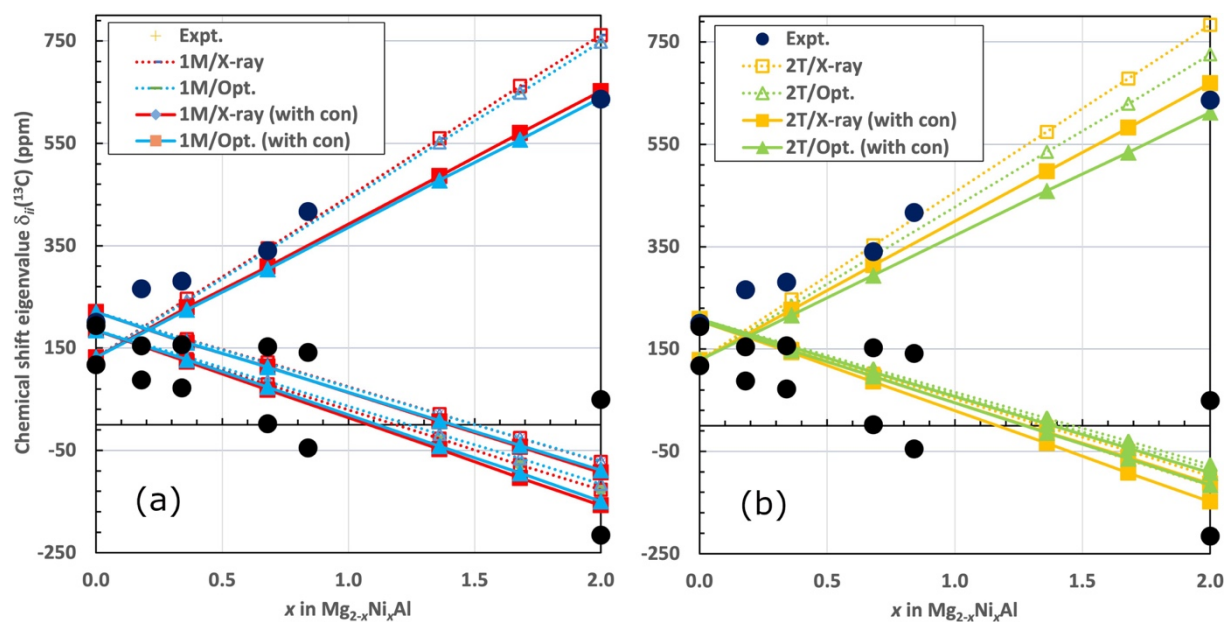

**Figure S6.** The experimental and computed total  $^{13}\text{C}$  chemical shift tensor eigenvalues ( $\delta_{11}$ ,  $\delta_{22}$ , and  $\delta_{33}$ , in ppm) for  $\text{CO}_3^{2-}$  in  $\text{Mg}_{2-x}\text{Ni}_x\text{Al}$ -LDH as functions of  $x$ . The computational results are shown both for the sum of the orbital and pseudocontact contributions (dashed lines and open symbols) and added with local hyperfine contribution  $\delta_{\text{con}}$  (full lines and symbols). Computations following method 3 are described in the text: The total shielding tensors for the different carbon sites of the 1M (sites C1 and C2) and 2T (sites C1-C4) models were first averaged and then the average tensors were diagonalised. The results are shown separately for experimental X-ray and computationally optimised structures of (a) 1M and (b) 2T type.

**Table S12.** The eigenvalues of averaged computational chemical shift tensors (in ppm) following method 3 described in the text for  $\text{Mg}_{2-x}\text{Ni}_x\text{Al-LDH}$  as functions of  $x$ . Data include the orbital, pseudocontact and local hyperfine contributions.

| Structure    | Eigenvalue    | $x = 0$ | $x = 0.36$ | $x = 0.68$ | $x = 1.36$ | $x = 1.68$ | $x = 2$ |
|--------------|---------------|---------|------------|------------|------------|------------|---------|
| 1M X-ray     | $\delta_{11}$ | 132     | 229        | 309        | 486        | 570        | 652     |
|              | $\delta_{22}$ | 220     | 160        | 113        | 7          | -43        | -93     |
|              | $\delta_{33}$ | 185     | 123        | 68         | -48        | -104       | -158    |
| 1M optimised | $\delta_{11}$ | 132     | 225        | 304        | 478        | 557        | 639     |
|              | $\delta_{22}$ | 220     | 160        | 113        | 8          | -40        | -88     |
|              | $\delta_{33}$ | 185     | 127        | 74         | -41        | -94        | -150    |
| 2T X-ray     | $\delta_{11}$ | 128     | 227        | 314        | 497        | 583        | 669     |
|              | $\delta_{22}$ | 209     | 147        | 96         | -13        | -62        | -114    |
|              | $\delta_{33}$ | 205     | 143        | 86         | -34        | -92        | -148    |
| 2T optimised | $\delta_{11}$ | 128     | 216        | 294        | 459        | 534        | 612     |
|              | $\delta_{22}$ | 209     | 154        | 105        | 3          | -43        | -92     |
|              | $\delta_{33}$ | 205     | 147        | 97         | -14        | -64        | -116    |



## References

1. TURBOMOLE V6.2 2010, a development of University of Karlsruhe and Forschungszentrum Karlsruhe GmbH, 1989-2007, TURBOMOLE GmbH, since 2007; available from <http://www.turbomole.com>.
2. Adamo C, Barone V. Toward reliable density functional methods without adjustable parameters: The PBE0 model. *J Chem Phys.* 1999;110(13):6158-6170. doi:10.1063/1.478522
3. Grimme S, Antony J, Ehrlich S, Krieg H. A consistent and accurate ab initio parametrization of density functional dispersion correction (DFT-D) for the 94 elements H-Pu. *J Chem Phys.* 2010;132(15). doi:10.1063/1.3382344
4. Grimme S, Ehrlich S, Goerigk L. Effect of the damping function in dispersion corrected density functional theory. *J Comput Chem.* 2011;32(7):1456-1465. doi:<https://doi.org/10.1002/jcc.21759>
5. Dolg M, Wedig U, Stoll H, Preuss H. Energy-adjusted ab initio pseudopotentials for the first row transition elements. *J Chem Phys.* 1987;86(2):866-872. doi:10.1063/1.452288
6. Weigend F, Haser M, Patzelt H, Ahlrichs R. RI-MP2: optimized auxiliary basis sets and demonstration of efficiency. *Chem Phys Lett.* 1998;294:143-152.
7. Krivovichev S V, Yakovenchuk VN, Zhitova ES, Zolotarev AA, Pakhomovsky YA, Ivanyuk GY. Crystal chemistry of natural layered double hydroxides. 2. Quintinite-1M: first evidence of a monoclinic polytype in  $M^{2+}$ - $M^{3+}$  layered double hydroxides. *Mineral Mag.* 2010;74(5):833-840. doi:DOI: 10.1180/minmag.2010.074.5.833
8. Zhitova ES, Krivovichev S V, Yakovenchuk VN, Ivanyuk GY, Pakhomovsky YA, Mikhailova JA. Crystal chemistry of natural layered double hydroxides: 4. Crystal structures and evolution of structural complexity of quintinite polytypes from the Kovdor alkaline-ultrabasic massif, Kola peninsula, Russia. *Mineral Mag.* 2018;82(2):329-346. doi:DOI: 10.1180/minmag.2017.081.046
